# Supplementary material for: Spatial distribution of gaseous pollutants (NO 2 , SO 2 , NH 3 , HNO 3 and O 3 ) in Abidjan, Cote d'Ivoire
Source: Copernicus journal article supplement (doi:10.5194/acp-2017-724), 2017-08-23
Supplement: Supplementary file [file acp-2017-724-RC1-supplement.pdf]

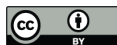

## Spatial distribution of gaseous pollutants (NO<sub>2</sub>, SO<sub>2</sub>, NH<sub>3</sub>, HNO<sub>3</sub> and O<sub>3</sub>) in Abidjan, Cote d'Ivoire

Julien Bahino<sup>1</sup>, Véronique Yoboué<sup>1</sup>, Corinne Galy-Lacaux<sup>2</sup>, Marcellin Adon<sup>1</sup>, Aristide Akpo<sup>3</sup>, Sékou Keita<sup>1</sup>, Cathy Liousse<sup>2</sup>, Eric Gardrat<sup>2</sup>, Christelle Chiron<sup>2</sup>, Money Ossouhou<sup>1</sup>, Sylvain Gnamien<sup>1</sup> and Julien Djossou<sup>3</sup>.

<sup>1</sup>Laboratoire de Physique de l'Atmosphère, Université Félix Houphouët-Boigny, Abidjan, BPV 34, Cote d'Ivoire

<sup>2</sup>Laboratoire d'Aérodologie, UMR 5560, Université Toulouse III Paul Sabatier and CNRS, 31400, Toulouse, France

<sup>3</sup>Laboratoire de Physique du Rayonnement, Université d'Abomey Calavi, Benin

Correspondence to: Julien Bahino ([julienbahino@gmail.com](mailto:julienbahino@gmail.com))

**Abstract.** This work is part of the DACCIWA FP7 program (Dynamics-Aerosol-Chemistry-Cloud Interactions in West Africa) in the framework of the work package 2 « Air Pollution and Health ». This study aims to characterize urban air pollution levels through the measurement of NO<sub>2</sub>, SO<sub>2</sub>, NH<sub>3</sub>, HNO<sub>3</sub> and O<sub>3</sub> in Abidjan, the economic capital of Cote d'Ivoire. Gases measurements are performed using INDAAF (International Network to study Deposition and Atmospheric chemistry in Africa) passive samplers exposed in duplicate for two weeks periods. We performed an intensive measurement campaign in Abidjan from December 15<sup>th</sup>, 2015 to February 16<sup>th</sup>, 2016 during the dry season. Twenty-one sites were selected in the district of Abidjan to be representative of various anthropogenic and natural sources of air pollution in the city. We collected 672 samples of gas during this period. Results from the intensive campaign show that gas concentrations are strongly linked to pollution sources nearby and show a high spatial variability on the different sites of Abidjan. However, three gases present relative higher levels of concentrations at all the sites: NH<sub>3</sub>, NO<sub>2</sub> and O<sub>3</sub>. NH<sub>3</sub> average concentrations vary between 9.1 ± 1.7 ppb at a suburban site and 102.1 ± 9.1 ppb at a domestic fires site. NO<sub>2</sub> mean concentration vary from 2.7 ± 0.1 ppb at a suburban site to 25.0 ± 1.7 ppb at an industrial site. We measured the two highest O<sub>3</sub> concentration on the two coastal sites located in the southeast of the city with average concentration of 19.1 ± 1.7 ppb and 18.8 ± 3.0 ppb respectively for Gonzagueville and the Felix Houphouët-Boigny international airport. The SO<sub>2</sub> average concentration never exceeds 7.2 ± 1.2 ppb at all the sites with 71.5 % of the sampling sites presenting concentrations ranged between 0.4 ppb and 1.9 ppb. The HNO<sub>3</sub> average concentration is comprised between 0.2 ppb and 1.4 ppb. All these results were combined with meteorological parameters to provide the first mapping of gaseous pollutants at the scale of the district of Abidjan using the geostatistical analysis (ArcGIS software). Spatial distribution results emphasize the importance of the domestic fires source and the significant impact of the traffic emissions at the scale of the city. In addition, we propose in this work a first overview of gaseous SO<sub>2</sub> and NO<sub>2</sub> concentrations at the scale of several African cities from literature compared to our measurements. The daily SO<sub>2</sub> standard of WHO is exceeded in most of the cities reported in the overview where concentrations range from 0.2 µg.m<sup>-3</sup> to 3662 µg.m<sup>-3</sup>. Annual NO<sub>2</sub> concentrations ranged from 2 µg.m<sup>-3</sup> to 175 µg.m<sup>-3</sup> are lower than the WHO threshold. As a conclusion, this study constitutes an original database to characterize urban air pollution and a first attempt toward a spatialization of the pollution levels at the scale of the metropolis of Abidjan. This work should draw the attention of the African public authorities to the necessity of air quality monitoring network in order to (1) to define national standards and to better control the pollutants emissions and (2) to investigate the impact on the health of the growing population of developing African countries.



## 1 Introduction

For several years, urban areas have experienced a deterioration in air quality and an increase in health and environmental impacts. Several scientific studies have shown that a large number of premature deaths, respiratory and cardiovascular diseases are related to air pollution (Brook et al., 2004; Murray, 2001; Pope III et al., 2002; Pope III and Dockery, 2006; WHO, 2006).

5 According to the World Health Organization estimation in 2012, 11.6 % of the deaths in the world were associated with outdoor and indoor air pollution. It represents nearly 6.5 million of deaths a year among which 3 million deaths were attributable only to ambient air pollution. 88 % of these deaths occurred in low- and middle-income countries (WHO, 2016). According to the OECD Development Centre, 700,000 premature deaths were linked to air pollution in Africa in 2013 (Roy Rana, 2016).

**Anthropogenic** activities are the main sources of emissions of gaseous and particulate pollutants into the air and their concentration measured in the urban atmosphere (Kampa and Castanas, 2008). ~~This problem has led the scientific community to address the issue in order to attract the attention of political authorities.~~ Several studies have been carried out in the major cities of Europe, Asia and northern America. These studies have shown the emergency of taking action to reduce emission of pollutant into the atmosphere in order to mitigate health and environmental impacts. Air quality networks have been set up in the major cities of United States of America and Europa to inform the public authorities and the population in real time.

15 Africa where researchers have found that air pollution causes more premature deaths per year than either unsafe drinking water or malnutrition, there is almost no quality network (Roy Rana, 2016). ~~However, very few studies on air pollution are carried out on the African continent and particularly on the West African region and in South Africa~~ (Norman et al., 2007). **The West African region** has experienced an economic upturn ~~these last years~~, characterized by an economic growth estimated at 4.2 % in 2015 with a **prospect of 6.3 % in 2016** (UNECA, 2016). A strong industrialization, an increase of trade, the improvement of transports and the building of modern infrastructure drive this growth. Most of the economic activity of the African countries are concentrated in the cities. In consequence, we notice a strong demographic explosion of cities favoured by massive rural exodus and by important migrations of the West African populations (Denis and Moriconi-Ebrard, 2009). This intense economic activity associated with the rapid population growth, the strong urbanization and the perpetual uncontrolled expansion of the city involve increasingly important anthropogenic emissions of gaseous and particulate pollutants. This causes

25 a significant deterioration of air quality that could alter the health of populations and ecosystems (Fourn and Fayomi, 2006; Norman et al., 2007). ~~The sanitary consequences induced by air pollution are now a cause for concern in the population. However, very few qualified dataset on levels of pollutants concentrations are available for African cities to sensitize populations and authorities in order to promote appropriate measures to reduce pollution.~~ Through some research programs and projects such as AMMA (African Monsoon Multidisciplinary Approach), INDAAF and POLCA (POLLution des Capitales Africaines), some experimental studies have been carried out in some African capitals and rural areas such as in Bamako, Dakar, Yaounde, and Amersfoort (Adon et al., 2016; Josipovic et al., 2010; Lioussé and Galy-Lacaux, 2010; Lourens et al., 2011; Val et al., 2013). The DACCIWA (Dynamics-Aerosols-Chemistry-Clouds Interactions in West Africa) European program follows the framework of the ~~previous cited~~ programs. The measurements implemented within the framework of DACCIWA are mainly focused on the ~~South of the West African region~~. DACCIWA has conducted extensive fieldwork in

35 SWA (**South West Africa**) to collect high-quality observations, spanning the entire process chain from surface-based natural and anthropogenic emissions to impacts on health, ecosystems, and climate (Knippertz et al., 2015). WP2 work package of the DACCIWA program aims to link emission sources, air pollution and health impacts in terms of lung inflammation and related diseases over representative differentiated urban sources in ~~South West Africa~~: traffic, domestic fires and waste burning in Abidjan (Cote d'Ivoire), and two-wheel vehicle traffic in Cotonou (Benin). The strategy in WP2 is based on a multidisciplinary approach (physics, chemistry, toxicology, epidemiology, modelling...).

40 Experimental results of WP2 rely both on ~~short~~ intensive campaigns and also on mid-term monitoring measurements on the different urban selected sites. Three urban supersites to represent the major urban sources ~~previously cited~~ have been selected for the mid-term monitoring from December 2014 to March 2017. **This** study presents results of the intensive campaign performed from December 15<sup>th</sup>, 2015 to February



16<sup>th</sup>, 2016. This work, part of the WP2, aims to characterize urban air pollution in the metropolis of Abidjan through the measurement of gaseous pollutants (NO<sub>2</sub>, SO<sub>2</sub>, NH<sub>3</sub>, HNO<sub>3</sub> and O<sub>3</sub>) concentrations. Twenty-one sampling sites distributed throughout the district of Abidjan were selected to be instrumented with passive samplers of gases to obtain from the observations the spatial distribution of each gaseous pollutant. This study allows to compare the contribution of each source of pollution and to compare the levels of concentration obtained in Abidjan with those of other cities in Africa and other developing countries.

## 2 Experimental design

Abidjan, the economic capital of Cote d'Ivoire is a cosmopolitan city of sub-Saharan Africa and one of the most important city in West Africa. Abidjan is located on the Ebrie Lagoon on the Gulf of Guinea in the south-east coast of Cote d'Ivoire. According to the National Statistics Institute, the mean annual population growth in Abidjan is about 2.6 %. The population has increased from 3.1 million in 1998 to 4.7 million in 2014 (NSI, 2015). With a population of about five million, Abidjan is the second most-populated African city, surpassed only by the Nigerian city of Lagos. Thus, Abidjan could be considered as a metropolis in West Africa with a rapid growth all over the surrounding municipalities. Today, the autonomous district of Abidjan is composed by ten municipalities in the city (Abobo, Adjamé, Attécoubé, Cocody, Koumassi, Marcory, Plateau, Port-Bouët, Treichville and Yopougon) and three neighboring municipalities (Anyama, Bingerville and Songon). The cumulated areas of these municipalities represent an area of 2119 km<sup>2</sup>, i.e., 0.66 % of the country (Yao-Kouassi, 2010) against 580 km<sup>2</sup> in 1990 (Kopieu, 1996). Abidjan is a port city and a dynamic economic center, not only for the country, but also for all the West African sub-region. The port of Abidjan, at the first rank in West Africa, contains 70 % of the country's industries and constitutes the main maritime facade for the hinterland countries (Burkina Faso, Niger and Mali). Abidjan shelters the main part of the companies of all the sectors of economic activity of the country. It represents 60 % of the Gross Domestic Product (GDP) of Cote d'Ivoire estimated according to the World Bank at 31.76 billion US dollars in (World Bank, 2016). This growth is mainly due to the port activity, to the creation of new companies and to the permanent installation of subsidiaries of international companies in the district of Abidjan. This intense economic activity required the creation of new industrial zones. The main sectors that support this economic growth are real estate, road transport, road building, manufacturing and mining industries.

A port city, the 6<sup>th</sup> metropolis of the continent and economic powerhouse for West Africa, Abidjan has experienced in recent years strong demographic and economic growth which emphasize different environmental issues such the air pollution. This is one of the main issue in West Africa capitals driven by explosive unplanned growth of urban conglomerations and faced to unregulated emissions.

To estimate the level of air pollution in the city, it is important to take into account most of the anthropogenic activities that may constitute sources of pollution. As a consequence, several measurement sites have been selected to spatially represent the different municipalities of the district of Abidjan.

### 2.1 Sampling sites

In this work, we developed an experimental strategy to build a network of measurement sites. The initiation of this measurement network was based on the conclusion of a preliminary report published in 2006 by the Canadian Tecslut firm ordered by the ministry of environment of Cote d'Ivoire. This study had envisaged the installation of an air quality monitoring network in the District of Abidjan. The report identified and fully described 50 potential measurement sites that finally have not been implemented. In this work, we take benefit of this first report to consider 15 sites. Our study uses the main criteria that guided the choice of sites and the objectives of DACCIWA program. These criteria are as follow: (1) to consider the population density of each municipalities as a factor of potential high sources of gaseous pollutant, (2) to obtain a representative



spatial coverage of the 13 municipalities of the district of Abidjan and (3) to document the main sources of air pollution identified within the framework of the program DACCWA (domestic fires, road traffic and waste burning) (Knippertz et al., 2015). Figure 1 presents the mapping of the 21 selected sites referenced from A<sub>1</sub> to A<sub>21</sub> and the major sources of pollution nearby in the district of Abidjan. Table 1 presents the details of each site by giving the name of the site, its geographical coordinates and the land use denomination. 10 sampling sites are classified as traffic sites (A<sub>1</sub> to A<sub>8</sub>, A<sub>10</sub>, A<sub>14</sub>) and 5 of them present a combination of traffic and a second major source of pollution (A<sub>4</sub>, A<sub>7</sub>, A<sub>8</sub>, A<sub>10</sub>, A<sub>14</sub>). Among these sites, A<sub>1</sub> is the DACCWA supersite representative of traffic. 3 sites are representative of industrial areas (A<sub>9</sub> to A<sub>11</sub>) and 4 sites of residential and popular district (A<sub>7</sub>, A<sub>8</sub>, A<sub>12</sub> and A<sub>13</sub>). 4 sites have been selected as suburban and one as a green area (A<sub>17</sub> to A<sub>21</sub>). Finally, two DACCWA supersites studied over a two years period (2015-2017) in terms of local emission sources are part of this study to be representative of the domestic fires (A<sub>16</sub>) and waste burning (A<sub>15</sub>).

## 2.2 Sampling and analysis

### 2.2.1 Sampling procedure

Concentrations of gaseous pollutants (NO<sub>2</sub>, SO<sub>2</sub>, HNO<sub>3</sub>, NH<sub>3</sub> and O<sub>3</sub>) were determined in ambient air of the district of Abidjan using the INDAAF (<http://indaaf.obs-mip.fr>) passive samplers method (Adon et al., 2010). These passive samplers developed by Laboratory of Aerology (LA) in Toulouse (France) using the work of (Ferm, 1991) were tested and qualified in the framework of the INDAAF project for the great African ecosystems over about fifteen years (Adon et al., 2010). Passive samplers have also been used for the measurement of gaseous pollutants concentration in urban areas during the POLCA (Pollution of African Capitals) program (Adon et al., 2016). Passive samplers can be used for indoors and outdoors monitoring in all environment (Salem et al., 2009) and provide good results (Gorecki and Namiesnik, 2002). They are suitable to investigate the spatial distribution of gaseous pollutants and establish the air quality monitoring network (Carmichael et al., 2003; Cox, 2003; Cruz et al., 2004). INDAAF passive samplers are small, silent and reliable. They don't need electricity and are based on the property of molecular diffusion of gases and species specific collection on impregnated filter to each pollutant measured (Galy-Lacaux et al., 2001). The calculation of gaseous pollutants concentrations in the air depends on the physical characteristics of the passive samplers, the duration of exposure and the meteorological parameters. We calculate gaseous pollutant average concentration in ppb using the following formula given by (Adon et al., 2010) Eq. (1):

$$C_{amb}(ppb) = \frac{(L/A) \cdot X \cdot R \cdot T}{t \cdot D \cdot P} \quad (1)$$

C<sub>amb</sub> (ppb) represents the concentration of the considered gaseous pollutant in ppb, X is the number of gas molecules trapped on the cellulose filter (μmol), R= 0.08206 L atm mol<sup>-1</sup> K<sup>-1</sup>. T is the average temperature during the sampling period (K), P is the mean atmospheric pressure during the sampling period, D is the molecular diffusion coefficient of gas in the air, t is the sampler's exposure duration (s) and the ratio L/A= 47.5 m<sup>-1</sup> is the air resistance coefficient for the INDAAF passive sampler (Adon et al., 2010).

The passive samplers have been prepared by the Laboratory of Aerology in Toulouse and dispatched in Abidjan, Cote d'Ivoire from December 15<sup>th</sup>, 2015 to February 16<sup>th</sup>, 2016 during the dry season. For each set of passive samplers set, blank samples are kept sealed to be used as field blanks. Some blanks are kept at the Laboratory and others sent to the sites. Passive samplers were exposed bi-monthly on the 21 measurement sites of the district of Abidjan to represent integrated two weeks period over the two months studied period. Passive samplers were mounted on stainless steel rails in duplicate and placed at a height of at least 2.5 meters above the ground. So, on each rail, we installed eight passive samplers with different colours for the different gases: two white passive samplers to measure ammonia (NH<sub>3</sub>), two black for nitric acid (HNO<sub>3</sub>) and sulfur dioxide (SO<sub>2</sub>), two grey for nitrogen dioxide (NO<sub>2</sub>) and two grey/black for ozone (O<sub>3</sub>) (Fig. 2). The reproducibility of the INDAAF passive samplers was found to be 20 %, 9.8 %, 14.3 %, 16.6 % and 10 % for HNO<sub>3</sub>, NO<sub>2</sub>, NH<sub>3</sub>, SO<sub>2</sub> and O<sub>3</sub> respectively. Detection

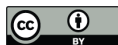

limits for each trace gas were calculated from field blanks filters and found to be  $0.07 \pm 0.03$  ppb for  $\text{HNO}_3$ ,  $0.2 \pm 0.1$  ppb for  $\text{NO}_2$ ,  $0.7 \pm 0.2$  ppb for  $\text{NH}_3$ ,  $0.05 \pm 0.03$  ppb for  $\text{SO}_2$  and  $0.1 \pm 0.1$  ppb for  $\text{O}_3$  (Adon et al., 2010). Passive samplers are then exposed for 2 weeks before being replaced by the new ones. Once removed, passive samplers are kept refrigerated before being shipped to the LA for analysis.

5

### 2.2.2 Chemical analysis

Each passive sampler contains a cellulose filter that is specifically pre-impregnated with a selective chemical solution to react with the studied gases molecules. All the details concerning the impregnation of chemical solutions and the associated reactions on filters, as far of the detailed analytical IC procedure are given in Adon et al. (2010). To determine and calculate the concentration of studied gaseous pollutants, ionic concentrations of ammonium ( $\text{NH}_4^+$ ), nitrate ( $\text{NO}_3^-$ ), sulfate ( $\text{SO}_4^{2-}$ ) and nitrite ( $\text{NO}_2^-$ ) are determined by ion chromatography (IC) after desorption of the filters in 10 mL of 18 MΩ deionized water by ultrasonic stirring (15 min). ~~The volume of desorption is 5 mL for the ammonia passive sampler.~~ The ion chromatography system used for this study has been extensively described by (Adon et al., 2010; Galy-Lacaux and Modi, 1998; Hodgkins et al., 2011). To check the reliability of the IC analytical results, the chemistry laboratory of LA of Toulouse participates twice a year since 1996 to the quality control inter-comparison program organized by WMO/GAW (World Meteorological Organization/ Global Atmospheric Watch) (Laouali et al., 2012). Results of the WMO/GAW quality assurance program for the year 2016 shows that analytical precision is estimated to be  $\pm 5\%$  for all ions (<http://www.qasac-americas.org/>). Over the study period, 672 passive samplers have been exposed and 2 were damaged. 670 samples and 48 blanks (12 for each gas) were analysed. 24 blanks have been kept in the laboratory and 24 other blanks were sent in the same condition with exposed passive samplers. Average concentration for each trace gas were calculated from field blanks and found to be  $0.37 \pm 0.02$  ppb for  $\text{NO}_2$ ,  $1.4 \pm 0.18$  ppb for  $\text{NH}_3$ ,  $0.09 \pm 0.00$  ppb for  $\text{HNO}_3$ ,  $0.01 \pm 0.00$  ppb for  $\text{SO}_2$  and  $0.08 \pm 0.04$  ppb for  $\text{O}_3$ . All samples are collected in duplicate. The average concentration of two samples is used in all the case except when contamination of one sample is suspected and when the average concentration is under the detection limit. 4 samples (0.6 %) were removed from the whole database. The final database represents 666 samples i.e 99.4 % of the analysed samples.

### 2.3 Meteorological data

Meteorological parameters used for this study were collected at the site ( $A_6$ ). ~~This site~~ is located at the weather station of the Félix Houphouët-Boigny international airport. This weather station is managed by ASECNA (Agency for Safety of Air Navigation in Africa and Madagascar) and provides meteorological data (~~Temperature, relative humidity, wind velocity and direction, pressure, ...~~) for air navigation in the district of Abidjan. The collected data for this study are direction and wind velocity, temperature and relative humidity. Daily variations of temperature and relative humidity during the studied period (December 15<sup>th</sup>, 2015 to February 16<sup>th</sup>, 2016) at the site  $A_6$  are presented in Fig. 3. Daily average temperature ranged between 25 °C and 29 °C. Mean relative humidity was about 78 % with a maximum of 92 % during the study period. This period was particularly dry with only two rainy days and a total cumulative rainfall of 32 mm. ~~The direction and velocity of wind during the study period on the site  $A_6$  are represented on the wind rose of Fig. 4.~~ The study of the hourly wind of Abidjan on the study period shows the predominance of southwest (SW) and north-northeast (NNE) winds directions. Wind velocity presents values ranged between 1 and 9 meters per second, with an average of  $2.75 \pm 0.6$  m.s<sup>-1</sup>. The observed meteorological parameters are characteristic of the major dry season in Cote d'Ivoire.

35

### 2.4 Spatial analysis

In this study, we interpolated the concentrations measured at the 21 sites to build spatial distribution of gases concentrations of the entire city of Abidjan using geostatistical analysis (GIS). The mapping tool is ArcGIS software in its version 10.2.2.

40



The features were projected using World Geodetic System (WGS\_1984) UTM\_Zone\_30N (Universal Transverse Mercator). Two interpolation methods are frequently used to study spatial distribution of pollutants. There are IDW (Inverse Distance Weighted) and kriging. The general formula for both interpolators is formed as a weighted sum of the data Eq. (2):

$$\hat{Z}(S_0) = \sum_{i=1}^N \lambda_i Z(S_i), \quad (2)$$

5  $\hat{Z}(S_0)$  is the predicted concentration at  $S_0$  location and is calculated as a linear weighted sum of  $N$  observations surrounding the predicted location.  $Z(S_i)$  is the measured concentration at the  $S_i$  location,  $\lambda_i$  is an unknown weight for measured concentration at the  $S_i$  location,  $S_0$  is the prediction location and  $N$  is the number of measured concentration. In IDW, the weight,  $\lambda_i$  depends only on the distance between the measurement points and the prediction location. For kriging method, the weights  $\lambda_i$  are based not only to the distance but also on the overall spatial arrangement of the sampling sites. IDW computes predicted concentrations at the location as a weighted average of neighbouring measured concentrations (Ibrahim et al., 2012; Rivera-Gonzalez et al., 2015). This method provides a spatial distribution of pollutants much closer to the reality. IDW method showed better similarity between measured and interpolated concentrations of sulfur dioxide ( $\text{SO}_2$ ) and nitrogen dioxide ( $\text{NO}_2$ ) (Jha et al., 2011). Kriging is the method of interpolation deriving from regionalized variable theory. It depends on expressing spatial variation of the property in terms of the variogram, and it minimizes the prediction errors which are themselves estimated (Oliver and Webster, 1990). According to kriging, we calculated for each studied pollutant, the coefficient of correlation between the interpolated concentrations and observed concentrations. Fig. 5a shows the regression between interpolated and observed concentration of  $\text{O}_3$ ,  $\text{SO}_2$ ,  $\text{HNO}_3$  and  $\text{NO}_2$  using ordinary kriging. For this study, results showed that the map produced extremely good predictions of monitored pollution level for average concentration on the 21 sampling sites during the dry season. Kriging gives best correlation coefficient for  $\text{O}_3$  followed by  $\text{SO}_2$ ,  $\text{HNO}_3$  and  $\text{NO}_2$  with respectively ( $r = 0.97, 0.92, 0.92, 0.74$ ). The critical value of the Pearson's correlation coefficient at the threshold of 5 % is  $r = 0.42$ . The correlation coefficient obtained for  $\text{NH}_3$  is  $r = 0.02$ . Kriging tends to overestimate the ammonia concentrations. Almost 70 % of the predicted values are above the observed concentrations. The absolute difference between the interpolated values and the observed values is between 3 and 69 ppb for 19 sampling sites out of 21. Extremely high concentrations of  $\text{NH}_3$  were obtained on the sampling sites  $A_{14}$  and  $A_{16}$  with 67.7 ppb and 102.1 ppb respectively. These concentrations correspond to measurements carried out within 5 m of the source of pollution. By removing these extreme concentrations of  $\text{NH}_3$  from the database during spatial interpolation, and using ordinary kriging, we recalculated the coefficient of correlation. Fig. 5b shows the regression between interpolated and observed concentration of  $\text{NH}_3$  using ordinary kriging. The correlation coefficient obtained between observed and interpolated concentrations increased from  $r = 0.02$  to 0.75. Regarding the high correlation coefficient between observed concentrations and interpolated concentrations, we chose ordinary kriging to represent the spatial distribution of  $\text{O}_3$ ,  $\text{NO}_2$ ,  $\text{SO}_2$ ,  $\text{HNO}_3$  and  $\text{NH}_3$ .

### 3 Results and discussion

During this study from December 15<sup>th</sup>, 2015 to February 16<sup>th</sup>, 2016, we collected 672 samples of the studied gas ( $\text{NO}_2$ ,  $\text{SO}_2$ ,  $\text{HNO}_3$ ,  $\text{NH}_3$ ,  $\text{O}_3$ ). We compile all the quality controlled passive samplers results to produce an original database for the district of Abidjan. Concentrations of gaseous pollutants at each sampling location for each two weeks were determined as the mean of two duplicates. The mean concentrations in ppb presented in Table 2 for the 21 sites are calculated from the mean of the four two-weeks periods sampled. We first discuss together these mean gaseous concentrations with the results we obtained of spatial distribution at the scale of the district of Abidjan. Then we will discuss gaseous pollutant concentrations by anthropogenic sectors of activity. A comparison of the average concentrations of pollutants at the scale of the District of Abidjan with other cities of Africa and Asia is also given. Finally, we finished this work by an overview of  $\text{NO}_2$  and  $\text{SO}_2$  air monitoring studies in Africa in order to assess how reported data compare to WHO air guidelines.



### 3.1 Spatial distribution of gaseous pollutants in Abidjan

In order to present the spatial distribution of gaseous pollutants under investigation, the center of the District of Abidjan is divided into rectangle of 35 km x 30 km between 5°22' N and 5°26' N, and 4°04' W and 4°07' W. Maps of each pollutant are presented using a colour scale from blue (low concentration) to red (high concentration in ppb) (Fig. 6 to Fig. 10). Black lines present administrative boundaries. Sampling sites are represented by black points and referenced with an ID code from A<sub>1</sub> to A<sub>21</sub>. Green lines on the spatial distribution map of NO<sub>2</sub> represent the main road network.

#### **Nitrogen dioxide (NO<sub>2</sub>)**

The spatial distribution of NO<sub>2</sub> concentrations in the district of Abidjan is represented on Fig. 6. This map indicates that NO<sub>2</sub> average concentrations during this dry season vary between 2.7 ppb and 25 ppb. The highest values were obtained at the Tri postal site (A<sub>11</sub>) (25 ppb). This site is representative both of the port and industrial activities. The second highest concentration is measured at the traffic site A<sub>5</sub> with a mean concentration of 23.9 ppb. It represents the signature of the pollutants emissions of the administrative center of Abidjan characterized by traffic jams every working day. Only those 2 sites have an average concentration higher than the WHO (World Health Organization) guideline value (40 µg.m<sup>-3</sup> or 21 ppb annual mean). Sites A<sub>1</sub>, A<sub>8</sub>, and A<sub>9</sub>, representative of traffic and industrial sites present comparable mean concentrations ranged between 19.9 ppb and 21 ppb. NO<sub>2</sub> concentrations decrease rapidly when we leave the city center of Abidjan to the periphery where the road network is less important and the main roads drawn in green on Fig 6. Similar results were found by Gilbert et al. (2003) in Montréal and Rodes and Holland (1981) in Los Angeles. Lowest values were measured on the suburban sites A<sub>19</sub> (5.4 ppb) and A<sub>18</sub> (2.7 ppb). The average NO<sub>2</sub> concentrations measured in Abidjan are usually most important when the sampling sites are located near an important road network. Traffic appears to be one of the main source of NO<sub>2</sub> emission in Abidjan. In 2014, more than 82 % of vehicles in circulation in Cote d'Ivoire tumbled into the district of Abidjan (Kouadio, 2014). The national agencies of urban transport (AGETU (AGence des Transports Urbains) and SONATT (SOCIÉTÉ NATIONALE des Transports Terrestres)) counted near than 423,587 vehicles of any types in 2010 (Goore Bi, 2011). Most of these vehicles are second-hand and have more than 20 year old (Ministry of Transport, 2012). These vehicles that no longer respect the standards of current air quality in European Union (E.U.) are most used because of their moderate price. The engines of these vehicles reject black smokes resulting from an incomplete combustion. Emissions of these black smokes are more important for the rush hours during traffic jams caused by the narrowness and the state of degradation of roads. The emission factor of black carbon (BC), in g/kg fuel for the use of diesel and gasoline in road traffic are respectively  $3.1 \pm 1.9$  and  $0.62 \pm 0.5$ . These emission factors for African developing countries were measured in Cote d'Ivoire and Benin (Keita et al, 2017, pers.com). Beside the road traffic, the industrial sector seems to be another great contributor to highest measured NO<sub>2</sub> concentration. Significant concentration levels around 20.9 ppb are measured on the three industrials sites (A<sub>11</sub>, A<sub>9</sub>, and A<sub>10</sub>). Abidjan has currently three industrial zones occupying a surface of 885 ha and the fourth is under construction. The biggest one is located at the municipality of Yopougon (645 ha) followed by the industrial zones of Vridi in the municipality of Port-Bouet (120 ha) and of Koumassi (120 ha) (ICI, 2014). The industrial zone of Vridi (A<sub>11</sub>) where the highest level concentration of NO<sub>2</sub> were measured (25 ppb) includes several activities related to the harbour area, shipyards, oil terminals, chimneys, thermal power station and processing and storage of petroleum products factories. Except oil and shipping industries, most of these activities are found in the other industrial zones. Other activities such as cement manufacturing, chemical industries and plastic production are also present. World Health Organization (2006) air quality guidelines and the work done by Krzyzanowski and Cohen, (2008) identify combustion processes in stationary sources (heating, power generation) and in mobile sources (internal combustion engines in vehicles and ships) as major sources of anthropogenic emission of nitrogen oxides into the atmosphere.

40



### **Sulfur dioxide (SO<sub>2</sub>)**

Figure 7 shows the spatial distribution of the SO<sub>2</sub> concentrations in Abidjan. SO<sub>2</sub> concentrations varied from a minimum of 0.4 ppb in the suburban site (A<sub>20</sub>) to the maximum of 7.2 ppb measured at the (A<sub>3</sub>) traffic site (Table 2). **The gap between these two values is mainly due to the location of the sites in the district of Abidjan and the related activities around.** The highest concentrations were generally obtained on the five traffic sites (A<sub>3</sub>, A<sub>2</sub>, A<sub>4</sub>, A<sub>19</sub>, A<sub>5</sub>) and on the A<sub>1</sub> suburban site with respective value of 7.2 ppb, 6.8 ppb, 4.7 ppb, 3.4 ppb, 3.1 ppb, and 2.6 ppb. We notice a decrease of SO<sub>2</sub> concentrations from the Northwest of the city where the main roads (Northern Highway and East Road) and the industrial zone of Yopougon (A<sub>9</sub>) are located to the Southeast of Abidjan near the Atlantic Ocean. The majority of the sampling sites (71.5 %) presents concentrations lower than 2 ppb. As for NO<sub>2</sub>, the highest SO<sub>2</sub> concentrations are observed in areas of dense traffic and in industrial zones. It should be noted that refining companies located in the industrial zone of Vridi (A<sub>11</sub>) don't have yet desulfurization unit. This kind of production unit could constitute an important source of SO<sub>2</sub> (Rodriguez and Hrbek, 1999; Tam et al., 1990). The sulfur content of the fuel produced and marketed in Cote d'Ivoire is higher than 2000 part per million (ppm) (CCAC and UNEP, 2016). This content is more than 40 times higher than the standards applied in most of the developed countries (50 ppm or below). There is also an intensive charcoal production through biomass burning in the northwest of the city. The large rubber plantations located in this area are regularly reconverted into charcoal using traditional ovens. **According to the study NAMA (Nationally Appropriate Mitigation Action) on sustainable charcoal in Cote d'Ivoire, the charcoal production increased by 22 % between 400,850 t in 2003 to 488,128 t in 2012. During the same period, firewood production increased from 8,699,979 m<sup>3</sup> to 9,034,617 m<sup>3</sup> (UNDP, 2015). Charcoal (47 %) and firewood (35 %) are the main sources of energy for households in urban area in Cote d'Ivoire. These products resulting from the incomplete combustion of carbon compounds are also important sources of SO<sub>2</sub> emission (Andreae, 1991).**

### **Ammonia (NH<sub>3</sub>)**

~~NH<sub>3</sub> is the most abundant alkaline gas in the atmosphere.~~ The main source of NH<sub>3</sub> emissions is **biomass burning including biofuel combustion**, agriculture, animal husbandry, NH<sub>3</sub>-based fertilizer, industrial processes and vehicular emission (Behera et al., 2013). In **urban areas, domestic fires, traffic and industrial activity are generally considered as major sources of NH<sub>3</sub>** (Perrino et al., 2002; Sapek, 2013; Sutton et al., 2000; Whitehead et al., 2007). In West African capitals, domestic fires and biomass burning are the main source of NH<sub>3</sub> emission (Lioussé et al., 2014). Anthropogenic emissions of NH<sub>3</sub> for the domestic fires source in Bamako (Mali) and Dakar (Senegal) have been estimated for 2005 to be 1.6 x 10<sup>-3</sup> TgNH<sub>3</sub> yr<sup>-1</sup> and 7.0 x 10<sup>-4</sup> TgNH<sub>3</sub> yr<sup>-1</sup> respectively (Adon et al., 2016). **In Abidjan NH<sub>3</sub> is also the gas that is found in a greater proportion on all the sampling sites (Table 2).** Figure 8 shows the spatial distribution of NH<sub>3</sub> in Abidjan. The domestic fires site (A<sub>16</sub>) has the highest concentration of NH<sub>3</sub> (102.1 ± 9.1 ppb). This site is a long term instrumented monitoring site of the DACCIWA project located near a traditional smokehouse of food products. It was selected to study the concentrations of pollutants emitted by domestic fires to the source. The second most important concentration of NH<sub>3</sub> was measured at the site A<sub>14</sub> located on the east of the city and characterized by domestic fires and the residential sector (67.7 ± 8.3 ppb). It should be noted that these 2 sites presenting very high concentrations corresponds to measurements performed less than 5 m from the source of pollution and were not integrated into the realization of the spatial distribution map of NH<sub>3</sub>. (section 2.4). ~~Generally,~~ **NH<sub>3</sub> concentrations are** ranged from 9.1 ± 1.7 ppb to 44.0 ± 2.2 ppb. High concentrations about 36.6 ± 4.1 ppb are measured in the west and the northeast of the city where most of the domestic fires, **residential and suburban sites** are located. One part of the Songon municipality located in the south-west of Abidjan between sites A<sub>18</sub> and A<sub>19</sub> regroups a set of poultry and pig farms because of the availability of space and its rural character (Yapi-Diahou et al., 2011). Golly and Koffi-Didia (2015) showed the existence of 63 modern poultry farms and 9 modern pig farms in this region. The liquid manure resulting from these breedings is one of the main sources of NH<sub>3</sub> and nitrogenous compounds emission (Degré et al., 2001). Total NH<sub>3</sub> emissions in France





in 2007 were estimated at 382 kt with 15 % of these emissions were due to poultry dejections (Gac et al., 2007). In the global  $\text{NH}_3$  anthropogenic source budget, (Bouwman et al., 2002) indicates that animal excreta source represents  $21.7 \text{ Mt yr}^{-1}$  of the total  $53.6 \text{ Mt yr}^{-1}$ . In addition to the various breedings, this area is full of large industrial and individual plantations of hevea and banana. These plantations often make excessive use of chemical fertilizers rich in urea. **The degradation of urea leads to the formation of  $\text{NH}_3$  (Degré et al., 2001).** At the east of Abidjan, we also observe on the waste burning site ( $A_{15}$ ) high concentration of  $\text{NH}_3$  ( $39.1 \pm 2.1 \text{ ppb}$ ). This site is located in the village of Akouedo and classified as an uncontrolled dump site of garbage (Kouame et al., 2006). With 153 ha, it receives all the vegetable, animal and industrial waste of the city of Abidjan since 1965. This huge waste is estimated at about 550,000 t per year (Kouame et al., 2006). The decomposition of the various waste could constitute an important source of  $\text{NH}_3$  emission as shown by our measurements. **To summarize,  $\text{NH}_3$  concentrations measured in the city of Abidjan represent a mixture of several sources (waste degradation, animals, agriculture...) associated with constant contribution of the domestic fires source.**

#### *Nitric acid ( $\text{HNO}_3$ )*

**$\text{HNO}_3$  and  $\text{NH}_3$  are important trace constituents of the atmosphere (Cadle et al., 1982).**  $\text{HNO}_3$  is believed to be a major end product in oxidation of gaseous nitrogen compounds. It is one of the mineral acid contributor to the acid rain (Cogbill and Likens, 1974). Figure 9 shows the spatial distribution of  $\text{HNO}_3$  in Abidjan during the dry season. The study of the spatial distribution of  $\text{HNO}_3$  in Abidjan showed that the concentrations are ranged between  $0.2 \pm 0.0 \text{ ppb}$  and  $1.4 \pm 0.3 \text{ ppb}$ . Approximately half of the sampling sites have concentration between  $1.1 \pm 0.3 \text{ ppb}$  and  $1.4 \pm 0.3 \text{ ppb}$ . **These sites are mainly located in the center and in the west of the city. The most important  $\text{HNO}_3$  concentrations was measured at a suburban site  $A_{17}$  ( $1.4 \pm 0.3 \text{ ppb}$ ), a waste burning site  $A_{15}$  and an industrial area  $A_9$  ( $1.3 \pm 0.2 \text{ ppb}$ ), a residential site.  $A_{13}$ , a domestic fires site  $A_{16}$  and a popular district  $A_7$  ( $1.2 \pm 0.3$ ).  $\text{HNO}_3$  appears to be emitted from several sources in the district of Abidjan. This could be explained by the fact that gaseous  $\text{HNO}_3$  is the result from several chemical transformation processes of  $\text{NH}_3$  and  $\text{NO}_x$  ( $\text{NO}_2 + \text{NO}$ ) guided by presence of oxidants such as  $\text{H}_2\text{O}_2$ ,  $\text{O}_3$  and OH radical (Seinfeld and Pandis, 2016; Kumar et al., 2004). Thus industrial activities, traffic, domestic fires, waste burning which may emit these different chemical compounds can contribute to levels of  $\text{HNO}_3$  in atmosphere.**

#### 25 **Ozone ( $\text{O}_3$ )**

$\text{O}_3$  is one of the most important contaminants in urban areas and has been associated with adverse effects on human health and natural environment (Hagenbjörk et al., 2017).  **$\text{O}_3$  is not emitted directly by primary sources, but formed in the lower atmosphere from photochemical interactions of gaseous precursors composed of nitrogen oxides ( $\text{NO}_x$ ) and volatile organic compounds (VOCs) (Duan et al., 2008; WHO, 2006).** At a specific location, the level of  $\text{O}_3$  concentration depends on emission to its precursors (VOCs and  $\text{NO}_x$ ), the long-range transport of  $\text{O}_3$  and meteorological parameters (Hagenbjörk et al., 2017). Two chemical regimes are associated with the rate of ozone production. The  $\text{NO}_x$ -saturated or (VOC-limited) regime and the  $\text{NO}_x$ -limited regime. In urban areas with high  $\text{NO}_x$  concentrations ( $\text{NO}_x$ -saturated) and a low ratio VOCs/ $\text{NO}_x$ , the ozone production rate is generally low and concentrations are in the order of few ppb. In some places, high concentrations can be observed, due to the recirculation of atmospheric air mass and specific meteorological conditions. When we leave the city center, in the peri-urban areas, we notice an increase of COV/ $\text{NO}_x$  ratio and a high  $\text{O}_3$  production because of the absence of major sources of  $\text{NO}_x$ , the dilution of air mass and the presence of biogenic VOCs. We measured  $\text{O}_3$  concentration at different location in the district of Abidjan. Figure 10 shows the spatial distribution of ozone in the district of Abidjan during the dry season. Generally, we notice the presence of  $\text{O}_3$  throughout the city. The levels of concentration increase considerably from the west to the east of Abidjan. The most important  $\text{O}_3$  concentrations were observed in the two coastal sampling sites  $A_6$  (Gonzagueville) and  $A_{20}$  (Airport-FHB) located in the southeast of the city with 19.1 ppb and 18.8 ppb respectively. These



two sites on the eastern outskirts of the city are characterized by a monthly sunshine ranging between 117 hours and 224 hours (Messou et al., 2013) and by a high relative humidity in the air due to the presence of water vapor from the marine spray. The OH radical is the major oxidant of the atmosphere. It directly controls the lifetime of VOCs and NO<sub>x</sub> (Sadanaga et al., 2012). It ensures the conversion of NO to NO<sub>2</sub> and is therefore responsible for the net production of ozone (Camredon and Aumont, 2007). We also measured significant concentrations at two other peri-urban sites in the east of the city: the waste burning site of the village of Akouedo (A<sub>15</sub>) and the suburban site of Bingerville (A<sub>17</sub>) with O<sub>3</sub> concentrations of 17.55 ppb and 16.76 ppb respectively. On the traffic sites (A<sub>1</sub>, A<sub>2</sub>, A<sub>7</sub>, A<sub>9</sub>) located near the Banco forest, ozone concentration was found to be between 11.3 ppb and 12.9 ppb. The lowest O<sub>3</sub> concentration in Abidjan was measured in the north of the city on the site A<sub>4</sub> (5.09 ppb).

### 3.2 Mean gaseous concentrations of the main anthropogenic activities in Abidjan and comparison with other cities of developing countries

The study of the spatial distribution of gaseous pollutants in Abidjan reveals different anthropogenic contributions to the measured levels of pollution. Therefore, we have tried to investigate the relation between the concentrations levels measured for each pollutant and the potential emission of each anthropogenic activity. Sampling sites were grouped by activity sectors source of pollution. Six different groups were formed. The main activities sources of pollution have been identified in section 3.1 to be traffic, industrial, residential, domestic fires, waste burning and suburban. For each sector, we calculated the mean concentration of each gaseous pollutant (Fig. 11). The analysis shows that the industrial sector mainly explains the highest measured NO<sub>2</sub> concentrations with an average concentration of  $20.9 \pm 2.8$  ppb. However, domestic fires, traffic and residential sites present very comparable levels of NO<sub>2</sub> concentrations of  $17.9 \pm 0.3$  ppb,  $17.8 \pm 4.7$  ppb and  $16.1 \pm 2.4$  ppb respectively compared to industrial sites. It should be noted that residential and domestic fires sites are strongly influenced by road traffic in Abidjan. The identified residential and domestic fires sites are never more than 10 meters far from roadways. This could explain the near-similar concentrations levels observed between traffic, domestic fires and residential sites. Waste burning ( $12.0 \pm 0.0$  ppb) and suburban ( $7 \pm 2.4$  ppb) sites present lower concentration of NO<sub>2</sub>. Nevertheless, these concentrations are not negligible and can be due, on one hand, to the limited traffic of the garbage collection vehicles and also on the other hand to the circulation of minibus called “gbaka” which connects the city centre to the suburbs.

Average O<sub>3</sub> concentrations are higher at the waste burning ( $17.6 \pm 0.0$  ppb) and suburban ( $12.2 \pm 4.3$  ppb) sites. All these sites are located far from the city centre. This result confirms the O<sub>3</sub> production far from the sources of primary pollutants and confirms the study of Klumpp et al. in 2006 on ozone pollution at urban and suburban areas. Traffic and industrial sites show comparable mean O<sub>3</sub> concentrations with  $10.2 \pm 1.3$  ppb and  $10.2 \pm 1.5$  respectively. NH<sub>3</sub> concentrations are significantly higher at domestic fires sites with an average concentration two to four times higher than for other sites ( $84.9 \pm 17.2$  ppb). This very high value highlights the use of biomass burning (firewood and charcoal) as a source of energy by most of households of Abidjan. The high standard deviation is due to the location of 2 of the domestic fires sites near the source while the other domestic fires sites are much further away from the source. The others groups of sites representative of waste burning (39.1 ppb) and traffic sources ( $27.2 \pm 3.1$  ppb) present NH<sub>3</sub> concentrations lower than 40 ppb. Peri-urban agriculture and intensive livestock in the Abidjan suburbs are mainly responsible for the suburban areas NH<sub>3</sub> concentration ( $22.6 \pm 10.3$  ppb). This value is close to concentrations measured at residential ( $21.9 \pm 5.2$  ppb) and industrial ( $20.7 \pm 0.7$  ppb) sites. Atmospheric HNO<sub>3</sub> in Abidjan is much more the fact of the waste burning sites with an average concentration of  $1.3 \pm 0.0$  ppb. All other sources of pollution have HNO<sub>3</sub> concentration ranging from  $0.6 \pm 0.3$  ppb to  $0.9 \pm 0.2$  ppb. The road traffic sector is the main contributor to the SO<sub>2</sub> pollution levels measured in Abidjan ( $4.2 \pm 2.2$  ppb). This result seems to be a good indicator of the quality of fuels used in Abidjan. In countries without stringent fuel policies such as Cote d'Ivoire, diesel sulphur content is generally important.

40

In order to place the concentrations of gaseous pollutants in Abidjan in a sub-regional and international context, we have listed in Table 3 some experimental studies using passive sampler to have a comparable measurement technique and also a



comparable temporal integration. Table 3 presents gaseous pollutants concentrations in African cities and in some industrialized cities of emerging Asian countries. The average concentration of NO<sub>2</sub> observed during the studied period at the different sites in Abidjan is generally lower than the WHO's annual average threshold (21 ppb or 40 µg.m<sup>-3</sup>). However, the average concentration observed at the industrial sites is about 20.9 ppb and varies between 17.7 ppb and 25 ppb. These values move closer to the threshold and sometimes exceed it at some of the sampling sites. These concentrations can affect health of most of vulnerable populations, such as children and elder (Barnett et al., 2005; Pandey et al., 2005). In Abidjan, we can assume that the risk exist because of the location of the industrial areas near some important residential places. Mean NO<sub>2</sub> concentration measured at the industrial sites of Abidjan (20.9 ppb) is of the same order of magnitude than concentrations measured at the urban site of Singapore (23.8-28.1 ppb) in South East Asia reported by (He et al., 2014). It remains lower than that obtained at the traffic sites of Dakar (31.7 ppb) and Al Ain city in the Middle East (31.5 ppb) (Adon et al. (2016) and Salem et al. (2009)). The levels of NO<sub>2</sub> concentration observed at Abidjan's traffic, residential and domestic fires sites are quite comparable to those measured at Bamako's traffic site (16.2 ppb).

The NH<sub>3</sub> concentration is the highest measured on all the sites presented in Table 3. The mean concentration of NH<sub>3</sub> (84.9 ppb) measured at the domestic fires sites in Abidjan is almost twice as high as that obtained in Bamako (46.7 ppb) and more than 30 ppb higher than that obtained in Cairo (50.9 ppb) (Hassan et al., 2013). The average concentration of NH<sub>3</sub> obtained on the traffic sites of Abidjan (27.2 ppb) is also higher than that of all the other traffic sites (except for Bamako and Cairo).

In Abidjan, HNO<sub>3</sub> concentrations present a low variability for all the different sites. The highest concentration measured at the waste burning site with 1.3 ppb is equal to that obtained at the traffic sites of Dakar (1.3 ppb) and above all the concentrations of HNO<sub>3</sub> presented in Table 3.

The average concentration of SO<sub>2</sub> measured at the traffic sites in Abidjan (4.2 ppb) is 2 to 4 times higher than the concentrations obtained at the other sites in Abidjan and close to concentrations measured at the Bamako's traffic site (3.6 ppb) and on the traffic site of Al Ain city (5.8 ppb). However, SO<sub>2</sub> concentration in Abidjan remains much lower than that obtained in Dakar (15.9 ppb), Cairo (13 ppb) and Singapore (12.5-14.9 ppb). It highlights significant differences in the sources of gaseous pollutants and their level of concentrations in West African and African cities and those in developing countries.

The most important ozone concentrations in Abidjan are obtained for the waste burning (17.6 ppb) and suburban sites (12.2 ppb). The ozone concentration is naturally higher than those obtained at the traffic sites of Abidjan, Dakar and Bamako. However, at the suburban site of Amersfoort, which is highly impacted by anthropogenic activities, higher concentrations than those of Abidjan were observed. For example, 23 ppb were measured over 2007-2008 (Lourens et al., 2011) and 27 ppb over the period 1995-2005 (Martins et al., 2007). The ozone concentrations in the African cities are much lower than those measured in the industrialized city of Shenzhen in China (35.6 ppb) (Xia et al., 2016).

### 3.3 Overview of urban NO<sub>2</sub> and SO<sub>2</sub> monitoring studies in African cities

Air quality monitoring networks are very important in assessing the health risk associated with exposure to gaseous pollutants. They also help governments to take measures of mitigation of the levels of pollutant concentrations and to define air quality indices (AQI) adapted to each country. If some synthesis of air quality measurements for particulate matter concentrations exist in the literature at the scale of Africa (Petkova et al., 2013), there is no overview for gaseous pollutants. Nowadays, it is quite difficult to provide an overview of air quality results for gaseous pollution over Africa because of the availability of only some non-perennial studies carried out within the framework of scientific research programs. The available results are also not always communicated publicly or in the literature. As this study shows, one of the main gaseous sources of air pollution in African cities is traffic road emitting NO<sub>2</sub> and SO<sub>2</sub>. This section aims to report the main studies on NO<sub>2</sub> and SO<sub>2</sub> conducted at different time scale (hourly, daily, weekly, monthly and annually) in African urban and industrial environments. This is the result of literature searches based on studies conducted in Africa between 2005 and 2017. Publications in which methodology or data reporting were clearly describe were selected. Recent and unpublished studies have also been presented for comparison.



Figure 12 presents the African countries, coloured by UN sub-region, for which NO<sub>2</sub> and SO<sub>2</sub> monitoring studies were identified and included in this work. The different sub-regions have different colours: red for the Northern Africa, yellow for Western Africa, orange for Eastern Africa, green for Central Africa and purple for Southern Africa. We found 22 publications on NO<sub>2</sub> and SO<sub>2</sub> measurements conducted at least in 20 African countries out of 54. We found that most of those measurements were located in seven West African countries (Senegal, Mali, Burkina Faso, Cote d'Ivoire, Nigeria, Ghana and Benin) and in five East African countries (Sudan, Kenya, Ethiopia, Uganda and Tanzania). Studies were also identified for four countries (Algeria, Tunisia, Morocco and Egypt) in Northern Africa and three countries (South Africa, Angola and Mozambique) in Southern Africa. Only one study was identified in Central Africa (Cameroon). To compare the levels of gaseous concentration in Africa with WHO air quality guidelines, we present the concentration level of each pollutant for each country using the mean, the minimum and the maximum values when available. Figure 13 and Figure 14 represent NO<sub>2</sub> and SO<sub>2</sub> levels in African cities as reported in the various studies respectively. Green bars represent lower and upper range of means if reported. Black points represent average concentration of gaseous pollutants. Red vertical lines illustrate current WHO guidelines at different time scale. Daily or hourly routine NO<sub>2</sub> and SO<sub>2</sub> do not exist in most of the African cities. Thus, only few studies allow the comparison with WHO standards. In most of the studies we found, monitoring campaigns were carried out with different methods. Some studies have used passive samplers of gases and others used real time active analysers or measurements using satellite. This makes difficult to compare results. The majority of these studies were carried out over fairly short periods.

#### **Nitrogen dioxide (NO<sub>2</sub>)**

According to NO<sub>2</sub>, short time exposure (1 hour) at a concentration of 200 µg.m<sup>-3</sup> is toxic and has significant health effects. The three studies at this time scale realized by Jackson, (2005) in Tanzania and Adon et al. (2016) in Senegal and Mali show that hourly NO<sub>2</sub> concentration range between (18 µg.m<sup>-3</sup> - 53 µg.m<sup>-3</sup>), (9.4 µg.m<sup>-3</sup> - 150 µg.m<sup>-3</sup>) and (15.8 µg.m<sup>-3</sup> - 135 µg.m<sup>-3</sup>) in Dar-es-Salam, Dakar and Bamako respectively (Fig. 13). These levels of concentration are under the WHO threshold. WHO air quality guidelines value for annual exposure to NO<sub>2</sub> concentration is 40 µg.m<sup>-3</sup>. Seven studies were carried during at least one year in Dakar (Senegal), Ouagadougou (Burkina Faso), Bamako (Mali), Abidjan (Cote d'Ivoire), South Africa and Ben Arous (Tunisia) (Bahino PhD, 2017 pers. com; Chaaban, 2008; Claire Demay et al., 2011; Josipovic et al., 2010; Nanaa et al., 2012). The average annual concentration of NO<sub>2</sub> in Ben Arous, Tunisia (178 µg.m<sup>-3</sup>) and in Dakar, Senegal (59.6 µg.m<sup>-3</sup>) are upper the WHO threshold value when the annual average concentration measured in Dakar, Ouagadougou and in South Africa range between (3.5 µg.m<sup>-3</sup> and 19.6 µg.m<sup>-3</sup>), (22 µg.m<sup>-3</sup> and 27 µg.m<sup>-3</sup>) and (2 µg.m<sup>-3</sup> and 7 µg.m<sup>-3</sup>) respectively. Almost nineteen studies were conducted at daily, weekly and monthly scales. 8 studies were conducted on a daily basis. Average 24-hour concentrations ranged from 0.1 µg.m<sup>-3</sup> along Juja road in Nairobi (Kaboro, 2006) to 752 µg.m<sup>-3</sup> on the traffic site of Dantokpa market in Cotonou (Mama et al., 2013). Only 3 studies measuring NO<sub>2</sub> on a weekly scale were identified. The maximum concentration (1015.34 µg.m<sup>-3</sup>) was measured in the city of Oweri, the capital of the oil-rich region of Imo state in Nigeria (Ibe et al., 2016). Except this extreme value, concentrations range from 9.32 µg.m<sup>-3</sup> in urban sites of Kampala (Uganda) to 60 µg.m<sup>-3</sup> in low-income areas of Accra (Ghana). Average monthly concentration is ranged from 2.6 µg.m<sup>-3</sup> to 87.2 µg.m<sup>-3</sup> for 8 studied sites. The lowest values were measured in Maputo (Mozambique) on a residential site and on a green area. The monthly average concentration in Maputo is 9.13 µg.m<sup>-3</sup> and varies between 2.6 µg.m<sup>-3</sup> and 21 µg.m<sup>-3</sup> (Cumbane et al., 2008). The highest monthly average concentration of NO<sub>2</sub> was measured in Bamako. Concentrations measured on traffic and industrial sites in Abidjan (33.5 µg.m<sup>-3</sup> and 39.3 µg.m<sup>-3</sup> respectively) in this study are of the same order of magnitude as the values obtained by (Lioussé and Galy-Lacaux, 2010) at urban sites in Abidjan (29.8 µg.m<sup>-3</sup>) and Yaoundé (33.3 µg.m<sup>-3</sup>). However, NO<sub>2</sub> measurements in Abidjan at hourly and annual scale that allow comparisons with WHO thresholds are not available or not published. It would therefore be wise for public authorities in Abidjan as well as in other African cities to carry out regular studies at comparable time scales and with recommended methods to obtain reliable results.



### *Sulfur dioxide (SO<sub>2</sub>)*

WHO indicates that changes in pulmonary function and respiratory symptoms appear after a ten-minute exposure period to SO<sub>2</sub> at a concentration of 500 µg.m<sup>-3</sup>. No study carried out with a minimum time interval of 10 minutes was reported in the literature. Twenty-four hour SO<sub>2</sub> levels is significantly associated with daily mortality rates (Burnett et al., 2004). WHO  
5 twenty-four hour guideline for SO<sub>2</sub> is 20 µg.m<sup>-3</sup>. Nine daily (24-hour) studies are reported on Fig. 14. Measurements in Cotonou (Benin) at the crossroad of Dantokpa market are characterized by a large circulation of two-wheeled vehicles and daily average concentrations range between 784.8 µg.m<sup>-3</sup> and 3662.4 µg.m<sup>-3</sup> (Mama et al., 2013). These concentrations are 39 to 183 times higher than the threshold value. In Dakar (68.54 µg.m<sup>-3</sup>), Cairo (34 µg.m<sup>-3</sup>), and Bamako (29.03 µg.m<sup>-3</sup>), SO<sub>2</sub> mean daily concentrations are greater than 20 µg.m<sup>-3</sup>. It is found that only 2 studies conducted in Marrakech (Morocco) and Tunis (Tunisia)  
10 have concentration ranges lower than the threshold. In Nairobi and Khartoum the maximum concentration can reach and exceed the threshold.

Hourly SO<sub>2</sub> concentration in Africa is found to be ranged from 9.14 µg.m<sup>-3</sup> to 214514 µg.m<sup>-3</sup>. In Luanda (Angola), concentrations are the highest and range between 13080 µg.m<sup>-3</sup> and 214514 µg.m<sup>-3</sup> (Amadio, 2010). We must note that this study focused on SO<sub>2</sub> content in diesel engine releases. In West Africa (Mali and Burkina), concentrations are much lower (9  
15 µg.m<sup>-3</sup> - 136 µg.m<sup>-3</sup>).

Approximately 6 studies report weekly and monthly concentrations of SO<sub>2</sub> (Fig. 14). Generally, weekly and monthly SO<sub>2</sub> concentrations in Africa range from 0.77 µg.m<sup>-3</sup> to 18.9 µg.m<sup>-3</sup>. The weekly concentrations measured in the oil state of Imo State (Nigeria) are not in this range (1203 µg.m<sup>-3</sup> to 1465 µg.m<sup>-3</sup>) (Ibe et al., 2016). The annual average concentrations of SO<sub>2</sub> are reported for 11 studies. The concentrations measured in North Africa are the highest. Average levels of SO<sub>2</sub> range between  
20 8 µg.m<sup>-3</sup> in Rabat (Morocco) and 325 µg.m<sup>-3</sup> in Alger (Algeria). In West Africa, concentrations are lower and range from 0.5 µg.m<sup>-3</sup> in Ouagadougou (Burkina Faso) to 80 µg.m<sup>-3</sup> in Dakar (Senegal). The annual average SO<sub>2</sub> concentration in Abidjan (3.66 µg.m<sup>-3</sup>) is one of the lowest of West African cities reported in this study (Bahino PhD, 2017 pers.com). Measurements of SO<sub>2</sub> at smaller time scales (10 min, 24 hours...) do not exist in Abidjan or are not published. As for NO<sub>2</sub>, studies should be carried out regularly and according to WHO standards.

### 25 **4 Conclusion and recommendations**

Abidjan is the economic capital of the West African sub region. It is a large industrial and commercial city. Abidjan has also the second most important port in sub-Saharan Africa. The new urban master plan of the city called "The Great Abidjan" foresees its extension to 6 peripheral municipalities. The district of Abidjan will increase from 13 to 19 municipalities by the  
30 year 2030. This extension will be accompanied by major infrastructure works which will include the construction of 7 new bridges, new access roads and bypasses to the city center, the creation of 2 metro lines, the opening of new industrial and commercial areas... In total, nearly hundred projects will be realized. Projections estimate a demographic growth that will increase the population of nearly 5,000,000 inhabitants to 8,414,000. The city will thus be more subject to the demographic pressure, the uncontrolled occupation of the land and the emission of gaseous and particulate pollutants.

The present study reports the gaseous concentrations measurements using passive samplers performed during an intensive  
35 experimental field campaigns in the framework of the Work Package 2 (Air Pollution and Health) of the European DACCIWA project. This work presents an original database of bi-monthly gaseous concentrations (NO<sub>2</sub>, SO<sub>2</sub>, NH<sub>3</sub>, HNO<sub>3</sub>, O<sub>3</sub>) in the district of Abidjan performed on 21 representative sites. This database allows for the first time to characterize the levels of gaseous concentration and to present a spatial distribution of gaseous pollution at the scale of the city of Abidjan during the dry season (December 15<sup>th</sup>, 2015 to February 16<sup>th</sup>, 2016).

40 Our results show that there is a great spatial variability of gaseous pollutants in Abidjan. The average concentrations of the main gaseous pollutants are ranged between (2.7 ppb - 25 ppb) for NO<sub>2</sub>, (9.1 ppb - 102.1 ppb) for NH<sub>3</sub>, (0.2 ppb - 1.4 ppb) for

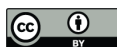

HNO<sub>3</sub>, (0.4 ppb - 7.21 ppb) for SO<sub>2</sub> and (5.1 ppb - 19.11 ppb) for O<sub>3</sub>. The spatial distribution of gaseous pollutant have been studied according the main potential sources of pollution nearby the measurement sites. Results show that the concentration level of gaseous pollutants such as NH<sub>3</sub> and NO<sub>2</sub> is very important at some sites. On one hand, it highlights the predominance of the domestic fires source with the use of wood and charcoal that emits large amount of NH<sub>3</sub>. On the second hand, it shows  
5 the significant impact of traffic road on NO<sub>2</sub> and SO<sub>2</sub> emissions. The car fleet is aging and restrictive measures on the importation of these vehicles are not always respected. Public authorities should introduce control of pollutant emissions at the exhaust of vehicles and improve road fluidity in order to reduce NO<sub>2</sub> and SO<sub>2</sub> emission.

By grouping the sites and calculating the average gases concentrations per source of pollution, we show that industrial (20.9 ppb), domestic fires (17.9 ppb) and traffic (17.8 ppb) sites largely contribute to the NO<sub>2</sub> pollution. Residential sites with an  
10 NO<sub>2</sub> average concentration of 16.1 ppb are strongly influenced by road traffic. Concerning NH<sub>3</sub>, domestic fires sites constitute by far the first sources of pollution with an average concentration of 84.9 ppb, almost two times higher than in Bamako and Cairo. The waste burning site characterized by the continuous combustion of different kinds of waste is the second main source of pollution by NH<sub>3</sub> (39.1 ppb). HNO<sub>3</sub> concentrations remain in a low range between 0.6 ppb and 0.9 ppb, except for the waste burning site (1.3 ppb). Abidjan, the other African cities and the big cities of Asia have almost identical average concentration  
15 of HNO<sub>3</sub>. In addition to the high concentration of NO<sub>2</sub>, the traffic sites have the highest SO<sub>2</sub> average concentration (4.2 ppb). NO<sub>2</sub> concentration measured on Abidjan industrial and traffic sites are generally of the same order of magnitude as those measured in the most of the big cities of Asia and Africa. SO<sub>2</sub> average concentration on the other sites is between 1 and 2 ppb. O<sub>3</sub> concentrations seem to be more or less constant over the city sites with an average concentration varying between 9 ppb and 10 ppb. Waste burning (17.6 ppb) and suburban (12.2 ppb) sites have the highest O<sub>3</sub> average concentration.

20 In this study, we built for the first time an overview of gaseous SO<sub>2</sub> and NO<sub>2</sub> pollutants which allows to give a global picture of gases concentrations at the scale of several African cities. It includes 22 publications on NO<sub>2</sub> and SO<sub>2</sub> measurements conducted in 20 African countries during the period 2005-2017. This study also emphasizes that in Abidjan, as in most of the major African cities, there are no air quality monitoring networks. Only a few studies carried out by research teams within the framework of scientific programs with various objectives give an idea of the state of air quality. These studies used different  
25 methods and time scales that do not allow comparison with WHO standards and threshold values. The comparable studies show that the hourly concentration of NO<sub>2</sub> in African cities (9.4 µg.m<sup>-3</sup> and 135 µg.m<sup>-3</sup>) is lower than the WHO standards. Abidjan annual NO<sub>2</sub> concentration is 23.25 µg.m<sup>-3</sup> with a range at the African cities scale from 2 µg.m<sup>-3</sup> to 175 µg.m<sup>-3</sup>. Annual NO<sub>2</sub> WHO standards are exceeded in Dakar and Tunis. The daily concentration of SO<sub>2</sub> in African cities ranges from 0.2 µg.m<sup>-3</sup> to 3662 µg.m<sup>-3</sup> and exceeds the daily SO<sub>2</sub> WHO standard (40 µg.m<sup>-3</sup>) in most of the African cities, except in Marrakech and  
30 Tunis. These scarce datasets should draw the attention of the African public authorities to the urgent need to measure NO<sub>2</sub> and SO<sub>2</sub> emissions.

The results indicate the need of other studies including VOCs and NO<sub>x</sub> measurements to better understand the production processes of secondary pollutants such as O<sub>3</sub>. In the framework of DACCIWA WP2 (Air Pollution and Health) program, bi monthly measurements are ongoing since December 2014 over three supersites. These measurements will make possible to  
35 estimate the impact of pollutants concentrations on the population health through the calculation of real dose response functions.

In Abidjan as well as in other African cities, legislations are taken to define national standards. Recent initiatives of the State of Cote d'Ivoire to limit and control emissions of pollutants into the atmosphere let hope for an improvement of air quality. Nowadays, infrastructures under construction coordinated by the PRICI project (Projet de Renaissance des Infrastructures de  
40 Cote d'Ivoire) and financed by the African Development Bank (AFDB) are part of sustainable development. The government of Cote d'Ivoire has also adopted a decree (no. 2017-125) on air quality in the Council of Ministers on 22 February 2017. On

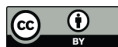

the one hand, the decree fixes the limit values for the ambient air gases and particulates concentrations emitted by motor vehicles and motorcycles. On the other hand, it defines air quality control procedures as well as the potential penalties. The authorities should continue their efforts by establishing a real air quality monitoring network in agreement with international standards.

## 5 Acknowledgment

This work has received funding from the European Union 7th Framework Programme (FP7/2007-2013) under Grant agreement no. 603502 (EU project DACCIWA: Dynamics-aerosol-chemistry-cloud interactions in West Africa). The authors wish also to thank the AMRUGE-CI (Appui à la Modernisation et à la Réforme des Universités et Grandes Ecoles de Cote d'Ivoire) project.



## References

- Abera kumie: Air Pollution in Ethiopia: Indoor Air Pollution in a rural Butajira and Traffic Air Pollution in Addis Ababa, School of Public Health Medical Faculty Addis Ababa University, Addis Ababa, June., 2009
- 5 Adon, M., Galy-Lacaux, C., Yoboue, V., Delon, C., Lacaux, J. P., Castera, P., Gardrat, E., Pienaar, J., Al Ourabi, H., Laouali, D., Diop, B., Sigha-Nkamdjou, L., Akpo, A., Tathy, J. P., Lavenu, F. and Mougin, E.: Long term measurements of sulfur dioxide, nitrogen dioxide, ammonia, nitric acid and ozone in Africa using passive samplers, *Atmospheric Chem. Phys.*, 10(15), 7467–7487, doi:10.5194/acp-10-7467-2010, 2010.
- 10 Adon, M., Yoboue, V., Galy-Lacaux, C., Liousse, C., Diop, B., Doumbia, E. H. T., Gardrat, E., Ndiaye, S. A. and Jarrot, C.: Measurements of NO<sub>2</sub>, SO<sub>2</sub>, NH<sub>3</sub>, HNO<sub>3</sub> and O<sub>3</sub> in West African urban environments, *Atmos. Environ.*, 135, 31–40, doi:10.1016/j.atmosenv.2016.03.050, 2016.
- Amadio, T. de M.: Análise das emissões provenientes da exaustão de motores diesel, [online] Available from: <https://repositorio.ufsc.br/xmlui/handle/123456789/99087> (Accessed 31 July 2017), 2010.
- 15 Andreae, M. O.: Biomass burning: its history, use, and distribution and its impact on environmental quality and global climate, *Glob. Biomass Burn. Atmospheric Clim. Biospheric Implic.*, 3–21, 1991.
- Arku, R. E., Vallarino, J., Dionisio, K. L., Willis, R., Choi, H., Wilson, J. G., Hemphill, C., Agyei-Mensah, S., Spengler, J. D. and Ezzati, M.: Characterizing air pollution in two low-income neighborhoods in Accra, Ghana, *Sci. Total Environ.*, 402(2), 217–231, 2008.
- 20 Barnett, A. G., Williams, G. M., Schwartz, J., Neller, A. H., Best, T. L., Petroeschevsky, A. L. and Simpson, R. W.: Air pollution and child respiratory health - A case-crossover study in Australia and new Zealand, *Am. J. Respir. Crit. Care Med.*, 171(11), 1272–1278, doi:10.1164/rccm.200411-1586OC, 2005.
- Behera, S. N., Sharma, M., Aneja, V. P. and Balasubramanian, R.: Ammonia in the atmosphere: a review on emission sources, atmospheric chemistry and deposition on terrestrial bodies, *Environ. Sci. Pollut. Res.*, 20(11), 8092–8131, doi:10.1007/s11356-013-2051-9, 2013.
- 25 Bouwman, A. F., Boumans, L. J. M. and Batjes, N. H.: Estimation of global NH<sub>3</sub> volatilization loss from synthetic fertilizers and animal manure applied to arable lands and grasslands, *Glob. Biogeochem. Cycles*, 16(2), 1024, doi:10.1029/2000GB001389, 2002.
- 30 Brook, R. D., Franklin, B., Cascio, W., Hong, Y. L., Howard, G., Lipsett, M., Luepker, R., Mittleman, M., Samet, J., Smith, S. C. and Tager, I.: Air pollution and cardiovascular disease - A statement for healthcare professionals from the expert panel on population and prevention science of the American Heart Association, *Circulation*, 109(21), 2655–2671, doi:10.1161/01.CIR.0000128587.30041.C8, 2004.
- Burnett, R. T., Stieb, D., Brook, J. R., Cakmak, S., Dales, R., Raizenne, M., Vincent, R. and Dann, T.: Associations between short-term changes in nitrogen dioxide and mortality in Canadian cities, *Arch. Environ. Health*, 59(5), 228–236, doi:10.3200/AEOH.59.5.228-236, 2004.
- 35 Cadle, S., Countess, R. and Kelly, N.: Nitric-Acid and Ammonia in Urban and Rural Locations, *Atmos. Environ.*, 16(10), 2501–2506, doi:10.1016/0004-6981(82)90141-X, 1982.
- Camredon, M. and Aumont, B.: I – L'ozone troposphérique : production/consommation et régimes chimiques, *Pollut. Atmos.*, (N°193), doi:10.4267/pollution-atmospherique.1404, 2007.
- 40 Carmichael, G. R., Ferm, M., Thongboonchoo, N., Woo, J. H., Chan, L. Y., Murano, K., Viet, P. H., Mossberg, C., Bala, R., Boonjawat, J., Upatum, P., Mohan, M., Adhikary, S. P., Shrestha, A. B., Pienaar, J. J., Brunke, E. B., Chen, T., Jie, T., Guoan, D., Peng, L. C., Dhiharto, S., Harjanto, H., Jose, A. M., Kimani, W., Kirouane, A., Lacaux, J. P., Richard, S., Barturen, O., Cerda, J. C., Athayde, A., Tavares, T., Cotrina, J. S. and Bilici, E.: Measurements of sulfur dioxide, ozone and ammonia concentrations in Asia, Africa, and South America using passive samplers, *Atmos. Environ.*, 37(9–10), 1293–1308, doi:10.1016/S1352-2310(02)01009-9, 2003.
- 45 CCAC and UNEP: Cleaning up the global on road-diesel fleet: A global strategy to introduce low-sulfur fuel and cleaner diesel vehicles...[online] Available from:





<https://www.google.fr/url?sa=t&rct=j&q=&esrc=s&source=web&cd=1&cad=rja&uact=8&ved=0ahUKEwia0Kn3pbPVAhVJQBoKHQw9A3UQFggnMAA&url=http%3A%2F%2Fwww.ccacoalition.org%2Fru%2Ffile%2F2277%2Fdownload%3Fto%3D%3DrRKxI5PN&usq=AFQjCNFP6dg9NtwghPscdhA67v-jTaXXuw> (Accessed 31 July 2017), 2016.

Chaaban, F. B.: Air quality, Arab Environ. Future Chall., 1, 45, 2008.

- 5 Claire Demay, Yves richard and Mbaye diop: La Pollution de l’Air à Dakar, Univ. Bourgogne [online] Available from: [http://climatologie.u-bourgogne.fr/documents/theses\\_master/2011/Demay\\_2011.pdf](http://climatologie.u-bourgogne.fr/documents/theses_master/2011/Demay_2011.pdf) (Accessed 29 June 2017), 2011.
- Cogbill, C. V. and Likens, G. E.: Acid precipitation in the northeastern United States, Water Resour. Res., 10(6), 1133–1137, doi:10.1029/WR010i006p01133, 1974.
- 10 Cruz, L. P. S., Campos, V. P., Silva, A. M. C. and Tavares, T. M.: A field evaluation of a SO<sub>2</sub> passive sampler in tropical industrial and urban air, Atmos. Environ., 38(37), 6425–6429, doi:10.1016/j.atmosenv.2004.07.022, 2004.
- Cumbane, J. J., Naran, A. U., Queface, A. J., Uthui, R. J., Liljeberg, M., Ferm, M., Iverfeldt, A. A., João, L. M., Macamo, A. J. and Magaia, S. J.: Rapid Urban Air Quality Assessment (RUA): A Cost-effective Tool for Air Quality Management in Less Developed Countries, [online] Available from: [http://www.academia.edu/download/38772220/Rapid\\_urban\\_air\\_quality\\_assessment\\_a\\_cost-effective\\_tool\\_for\\_air\\_quality\\_management.pdf](http://www.academia.edu/download/38772220/Rapid_urban_air_quality_assessment_a_cost-effective_tool_for_air_quality_management.pdf) (Accessed 8 August 2017), 2008.
- 15 Degré, A., Verhève, D. and Debouche, C.: Emissions gazeuses en élevage porcin et modes de réduction: revue bibliographique, Biotechnol. Agron. Société Environ., 5(3), 135–143, 2001.
- Denis, E. and Moriconi-Ebrard, F.: La croissance urbaine en Afrique de l’Ouest, Chron. CEPED, (57), 1–5, 2009.
- 20 Duan, J., Tan, J., Yang, L., Wu, S. and Hao, J.: Concentration, sources and ozone formation potential of volatile organic compounds (VOCs) during ozone episode in Beijing, Atmospheric Res., 88(1), 25–35, doi:10.1016/j.atmosres.2007.09.004, 2008.
- Ferm, M.: A Sensitive Diffusional Sampler, Swedish Environmental Research Institute, Sweden. [online] Available from: <https://books.google.fr/books?id=cmZgMgAACAAJ>, 1991.
- 25 Fourn, L. and Fayomi, E. B.: Pollution atmosphérique en milieu urbain à Cotonou et à Lokossa, Bénin., Bull Soc Pathol Exot, 99(4), 264–268, 2006.
- Gac, A., Béline, F. and Bioteau, T.: Inventaire national des émissions gazeuses (CH<sub>4</sub>, N<sub>2</sub>O, NH<sub>3</sub>) liées à la gestion des déjections : les données bibliographiques et les résultats pour l’élevage avicole, MyScienceWork [online] Available from: <https://www.mysciencework.com/publication/show/c5e969954ec97a49e2e97fe290413044> (Accessed 14 November 2016), 2007.
- 30 Galy-Lacaux, C. and Modi, A. : Precipitation chemistry in the Sahelian savanna of Niger, Africa, J. Atmospheric Chem., 30(3), 319–343, doi:10.1023/A:1006027730377, 1998.
- Galy-Lacaux, C., Carmichael, G. R., Song, C. H., Lacaux, J. P., Al Ourabi, H. and Modi, A. I.: Heterogeneous processes involving nitrogenous compounds and Saharan dust inferred from measurements and model calculations, J. Geophys. Res.-Atmospheres, 106(D12), 12559–12578, doi:10.1029/2000JD900778, 2001.
- 35 Gilbert, N. L., Woodhouse, S., Stieb, D. M. and Brook, J. R.: Ambient nitrogen dioxide and distance from a major highway, Sci. Total Environ., 312(1–3), 43–46, doi:10.1016/S0048-9697(03)00228-6, 2003.
- Golly, A.-R. N. and Koffi-Didia, A. M.: Logique de dispersion des espaces d’élevage dans la sous-préfecture de Songon, Syllabus Rev., 6(1), 175–200, 2015.
- 40 Goore Bi, H.: Actualité Auto.ci | Transport terrestre en Côte d’Ivoire :Un parc national de plus de 423500 véhicules, Auto.ci [online] Available from: [http://www.auto.ci/news/transport-terrestre-en-Côte-d-ivoire-un-parc-national-de-plus-de-423500-vehicules\\_266.html](http://www.auto.ci/news/transport-terrestre-en-Côte-d-ivoire-un-parc-national-de-plus-de-423500-vehicules_266.html) (Accessed 9 August 2017), 2011.
- Gorecki, T. and Namiesnik, J.: Passive sampling, Trac-Trends Anal. Chem., 21(4), 276–291, doi:10.1016/S0165-9936(02)00407-7, 2002.
- 45 Hagenbjörk, A., Malmqvist, E., Mattisson, K., Sommar, N. J. and Modig, L.: The spatial variation of O<sub>3</sub>, NO, NO<sub>2</sub> and NO<sub>x</sub> and the relation between them in two Swedish cities, Environ. Monit. Assess., 189(4), 161, doi:10.1007/s10661-017-5872-z, 2017.



- Hassan, S. K., El-Absawy, A. A. and Khoder, M. I.: Characteristics of gas-phase nitric acid and ammonium-nitrate-sulfate aerosol, and their gas-phase precursors in a suburban area in Cairo, Egypt, *Atmospheric Pollut. Res.*, 4(1), 117–129, doi:10.5094/APR.2013.012, 2013.
- 5 He, J., Xu, H., Balasubramanian, R., Chan, C. Y. and Wang, C.: Comparison of NO<sub>2</sub> and SO<sub>2</sub> Measurements Using Different Passive Samplers in Tropical Environment, *Aerosol Air Qual. Res.*, 14(1), 355–363, doi:10.4209/aaqr.2013.02.0055, 2014.
- Hodgkins, R. E., Grzywacz, C. M. and Garrell, R. L.: An improved ion chromatography method for analysis of acetic and formic acid vapours, *E-Preserv. Sci. E-PS*, 8, 74–80, 2011.
- Ibe, F. C., Njoku, P. C., Alinnor, J. I. and Opara, A. I.: Spatial variation of NO<sub>2</sub> and SO<sub>2</sub> in the ambient environment of Imo State, Nigeria, *Int. J. Sci. Environ. Technol.*, 5, 33–46, 2016.
- 10 Ibrahim, M. Z., Ismail, M. and Hwang, Y. K.: Mapping the Spatial Distribution of Criteria Air Pollutants in Peninsular Malaysia Using Geographical Information System (GIS), *Tech*, doi:10.5772/32902, 2012.
- ICI: Investir en Côte d'Ivoire: Réhabilitation des zones industrielles d'Abidjan, [ici2014.com](http://ici2014.com) [online] Available from: <http://ici2014.com/projets/rehabilitation-des-zones-industrielles-dabidjan/> (Accessed 9 August 2017), 2014.
- Inchaouh, M., Tahiri, M. and Abboubi, B. E. J. R.: State of ambient air quality in Marrakech city (Morocco) over the period 15 2009–2012, *Int. J.*, 12(29), 99–106, 2017.
- Jackson, M. M.: Air pollution in southern Africa: The case of motor vehicle exhaust contribution in Dar Es Salaam city, *J. Build. Land Dev.*, 12(1–3), 1–19, 2005.
- Jha, D. K., Sabesan, M., Das, A., Vinithkumar, N. V. and Kirubakaran, R.: Evaluation of Interpolation Technique for Air Quality Parameters in Port Blair, India., *Univers. J. Environ. Res. Technol.*, 1(3) [online] Available from: 20 <http://www.environmentaljournal.org/1-3/ujert-1-3-10.pdf> (Accessed 8 August 2017), 2011.
- Josipovic, M., Annegarn, H. J., Kneen, M. A., Pienaar, J. J. and Piketh, S. J.: Concentrations, distributions and critical level exceedance assessment of SO<sub>2</sub>, NO<sub>2</sub> and O<sub>3</sub> in South Africa, *Environ. Monit. Assess.*, 171(1–4), 181–196, doi:10.1007/s10661-009-1270-5, 2010.
- Kaboro, B. M.: Assessment of levels of Urban Air Pollutants and Trace Elements in Roadside Soils; A case Study in Eastleigh Area, Nairobi, [online] Available from: <http://uonlibrary.uonbi.ac.ke/content/assessment-levels-urban-air-pollutants-and-trace-elements-roadside-soils-case-study-eastleigh> (Accessed 8 August 2017), 2006.
- Kampa, M. and Castanas, E.: Human health effects of air pollution, *Environ. Pollut.*, 151(2), 362–367, doi:10.1016/j.envpol.2007.06.012, 2008.
- Khogali, H. A. M.: Impact Of Khartoum Refinery Gaseous By-Products On The Environment, [online] Available from: 30 [https://www.researchgate.net/profile/Hind\\_Abdel\\_moneim/publication/292152169\\_Pinnacle\\_Educational\\_Research\\_Development\\_Impact\\_Of\\_Khartoum\\_Refinery\\_Gaseous\\_By-Products\\_On\\_The\\_Environment/links/56ab4d3f08aed814bde96695.pdf](https://www.researchgate.net/profile/Hind_Abdel_moneim/publication/292152169_Pinnacle_Educational_Research_Development_Impact_Of_Khartoum_Refinery_Gaseous_By-Products_On_The_Environment/links/56ab4d3f08aed814bde96695.pdf) (Accessed 29 June 2017), 2016.
- Kirenga, B. J., Meng, Q., Van Gemert, F., Aanyu-Tukamuhebwa, H., Chavannes, N., Katamba, A., Obai, G., Molen, T. van der, Schwander, S. and Mohsenin, V.: The state of ambient air quality in two Ugandan cities: a pilot cross-sectional spatial 35 assessment, *Int. J. Environ. Res. Public Health*, 12(7), 8075–8091, 2015.
- Klumpp, A., Ansel, W., Klumpp, G., Calatayud, V., Garrec, J. P., He, S., Penuelas, J., Ribas, A., Ro-Poulsen, H., Rasmussen, S., Sanz, M. J. and Vergne, P.: Ozone pollution and ozone biomonitoring in European cities. Part I: Ozone concentrations and cumulative exposure indices at urban and suburban sites, *Atmos. Environ.*, 40(40), 7963–7974, doi:10.1016/j.atmosenv.2006.07.017, 2006.
- 40 Knippertz, P., Coe, H., Chiu, J. C., Evans, M. J., Fink, A. H., Kalthoff, N., Lioussé, C., Mari, C., Allan, R. P., Brooks, B., Danour, S., Flamant, C., Jegede, O. O., Lohou, F. and Marsham, J. H.: The DACCWA Project Dynamics-Aerosol-Chemistry-Cloud Interactions in West Africa, *Bull. Am. Meteorol. Soc.*, 96(9), 1451–1460, doi:10.1175/BAMS-D-14-00108.1, 2015.
- Kopieu, G.: Déchets solides en milieu urbain d'Afrique de l'ouest et centrale, vers une gestion durable, *Serie seminaire PDM-VIII*, pp.53–58., 1996.
- 45 Kouadio, C.: Abidjan: plus de 300 000 véhicules en circulation | Actualité | Acturoutes.info, [Acturoutes.info](http://www.acturoutes.info) [online] Available from: <https://www.acturoutes.info/page.php?p=1&id=4279> (Accessed 9 August 2017), 2014.



- Kouame, I. K., Gone, D. L., Savane, I., Kouassi, E. A., Koffi, K., Goula, B. T. A. and Diallo, M.: Mobilité relative des métaux lourds issus de la décharge d'Akouédo et risque de contamination de la nappe du Continental Terminal (Abidjan - Côte d'Ivoire), *Afr. Sci. Rev. Int. Sci. Technol.*, 2(1) [online] Available from: <https://www.ajol.info/index.php/afsci/article/view/61133> (Accessed 8 August 2017), 2006.
- 5 Krzyzanowski, M. and Cohen, A.: Update of WHO air quality guidelines, *Air Qual. Atmosphere Health*, 1(1), 7–13, doi:10.1007/s11869-008-0008-9, 2008.
- Kumar, R., Gupta, A., Kumari, K. M. and Srivastava, S. S.: Simultaneous measurements of SO<sub>2</sub>, NO<sub>2</sub>, HNO<sub>3</sub> and NH<sub>3</sub>: seasonal and spatial variations, *Curr. Sci.*, 87(8), 1108–1115, 2004.
- Laouali, D., Galy-Lacaux, C., Diop, B., Delon, C., Orange, D., Lacaux, J. P., Akpo, A., Lavenu, F., Gardrat, E. and Castera, P.: Long term monitoring of the chemical composition of precipitation and wet deposition fluxes over three Sahelian savannas, *Atmos. Environ.*, 50, 314–327, doi:10.1016/j.atmosenv.2011.12.004, 2012.
- 10 Lioussé, C. and Galy-Lacaux, C.: Pollution urbaine en Afrique de l'Ouest, *La Météorologie*, (71), 45–49, doi:10.4267/2042/37377, 2010.
- Lioussé, C., Assamoi, E., Criqui, P., Granier, C. and Rosset, R.: Explosive growth in African combustion emissions from 2005 to 2030, *Environ. Res. Lett.*, 9(3), 035003, doi:10.1088/1748-9326/9/3/035003, 2014.
- 15 Lourens, A. S., Beukes, J. P., van Zyl, P. G., Fourie, G. D., Burger, J. W., Pienaar, J. J., Read, C. E. and Jordaan, J. H.: Spatial and temporal assessment of gaseous pollutants in the Highveld of South Africa, *South Afr. J. Sci.*, 107(1–2), 1–8, doi:10.4102/sajs.v107i1/2.269, 2011.
- Mama, D., Dimon, B., Aina, M., Adoukpe, J., Ahomadegbe, M., Youssao, A., Kouazoude, J., Kouanda, S. P. and Moudachirou, M.: Transport urbain au Bénin et pollution atmosphérique: évaluation quantitative de certains polluants chimiques de Cotonou, *Int. J. Biol. Chem. Sci.*, 7(1), 377–386, 2013.
- 20 Martins, J. J., Dhammapala, R. S., Lachmann, G., Galy-Lacaux, C. and Pienaar, J. J.: Long-term measurements of sulphur dioxide, nitrogen dioxide, ammonia, nitric acid and ozone in southern Africa using passive samplers, *South Afr. J. Sci.*, 103(7–8), 336–342, 2007.
- 25 Messou, A., Coulibaly, L., Dombia, L. and Gourene, G.: Plants diversity and phytoaccumulators identification on the Akouédo landfill (Abidjan, Côte d'Ivoire), *Afr. J. Biotechnol.*, 12(3), doi:10.5897/AJB12.1664, 2013.
- Ministry of Transport: Ministère des Transports - République de Côte d'Ivoire, [online] Available from: <http://www.transports.gouv.ci/projetsuite.php?rd=2> (Accessed 9 August 2017), 2012.
- Murray, F.: Air pollution and respiratory disease, World Health Organ. [online] Available from: <https://www.mysciencework.com/publication/show/0988aea7674f5ae032549c69b0fc8e75> (Accessed 8 August 2017), 2001.
- 30 Nanaa, B., Sanogob, O., Savadogo, P., Dahoa, T., Boudad, M. and Kouliadiata, J.: Air Quality Study in Urban Centers: Case Study of Ouagadougou, Burkina Faso, *FUTY J. Environ.*, 7(1), doi:10.4314/fje.v7i1.1, 2012.
- Norman, R., Barnes, B., Mathee, A. and Bradshaw, D.: Estimating the burden of disease attributable to indoor air pollution from household use of solid fuels in South Africa in 2000, *S. Afr. Med. J.*, 97(8), 764–771, 2007.
- 35 NSI: Institut National de la Statistique: rgph 2014 Côte d'Ivoire: Résultats Globaux, Inst. Natl. Stat. [online] Available from: <http://www.ins.ci/n/RESULTATS%20GLOBAUX.pdf> (Accessed 3 November 2016), 2015.
- Obanijesu, E. O., Adebisi, F. M., Sonibare, J. A. and Okelana, O. A.: Air-borne SO<sub>2</sub> pollution monitoring in the upstream petroleum operation areas of Niger-Delta, Nigeria, *Energy Sources Part A*, 31(3), 223–231, 2009.
- 40 Oliver, M. A. and Webster, R.: Kriging: a method of interpolation for geographical information systems, *Int. J. Geogr. Inf. Syst.*, 4(3), 313–332, doi:10.1080/02693799008941549, 1990.
- Pandey, J. S., Kumar, R. and Devotta, S.: Health risks of NO<sub>2</sub>, SPM and SO<sub>2</sub> in Delhi (India), *Atmos. Environ.*, 39(36), 6868–6874, doi:10.1016/j.atmosenv.2005.08.004, 2005.
- Perrino, C., Catrambone, M., Di Menno Di Bucchianico, A. and Allegrini, I.: Gaseous ammonia in the urban area of Rome, Italy and its relationship with traffic emissions, *Atmos. Environ.*, 36(34), 5385–5394, doi:10.1016/S1352-2310(02)00469-7, 2002.
- 45



- Petkova, E. P., Jack, D. W., Volavka-Close, N. H. and Kinney, P. L.: Particulate matter pollution in African cities, *Air Qual. Atmosphere Health*, 6(3), 603–614, doi:10.1007/s11869-013-0199-6, 2013.
- Pope III, C. A. and Dockery, D. W.: Health Effects of Fine Particulate Air Pollution: Lines that Connect, *J. Air Waste Manag. Assoc.*, 56(6), 709–742, doi:10.1080/10473289.2006.10464485, 2006.
- 5 Pope III, C. A., Burnett, R. T., Thun, M. J., Calle, E. E., Krewski, D., Ito, K. and Thurston, G. D.: Lung Cancer, Cardiopulmonary Mortality, and Long-term Exposure to Fine Particulate Air Pollution, *JAMA*, 287(9), 1132–1141, doi:10.1001/jama.287.9.1132, 2002.
- Raheem, A. M. O. A., Adekola, F. A. and Obioh, I. O.: The Seasonal Variation of the Concentrations of Ozone, Sulfur Dioxide, and Nitrogen Oxides in Two Nigerian Cities, *Environ. Model. Assess.*, 14(4), 497–509, doi:10.1007/s10666-008-9142-x, 2009.
- 10 Rivera-Gonzalez, L. O., Zhang, Z., Sanchez, B. N., Zhang, K., Brown, D. G., Rojas-Bracho, L., Osornio-Vargas, A., Vadillo-Ortega, F. and O'Neill, M. S.: An assessment of air pollutant exposure methods in Mexico City, Mexico, *J. Air Waste Manag. Assoc.*, 65(5), 581–591, doi:10.1080/10962247.2015.1020974, 2015.
- Rodes, C. E. and Holland, D. M.: Variations of NO, NO<sub>2</sub> and O<sub>3</sub> concentrations downwind of a Los Angeles freeway, *Atmospheric Environ.* 1967, 15(3), 243–250, doi:10.1016/0004-6981(81)90024-X, 1981.
- 15 Rodriguez, J. A. and Hrbek, J.: Interaction of sulfur with well-defined metal and oxide surfaces: Unraveling the mysteries behind catalyst poisoning and desulfurization, *Acc. Chem. Res.*, 32(9), 719–728, doi:10.1021/ar9801191, 1999.
- Roy Rana: “The cost of air pollution in Africa”, OECD Development Centre Working Papers, OECD Publ. Paris, (333), 56, doi:10.1787/18151049, 2016.
- 20 Sadanaga, Y., Sengen, M., Takenaka, N. and Bandow, H.: Analyses of the Ozone Weekend Effect in Tokyo, Japan: Regime of Oxidant (O<sub>3</sub> + NO<sub>2</sub>) Production, *Aerosol Air Qual. Res.*, 12(2), 161–168, doi:10.4209/aaqr.2011.07.0102, 2012.
- Salem, A. A., Soliman, A. A. and El-Haty, I. A.: Determination of nitrogen dioxide, sulfur dioxide, ozone, and ammonia in ambient air using the passive sampling method associated with ion chromatographic and potentiometric analyses, *Air Qual. Atmosphere Health*, 2(3), 133–145, doi:10.1007/s11869-009-0040-4, 2009.
- Sapek, A.: Ammonia Emissions from Non-Agricultural Sources, *Pol. J. Environ. Stud.*, 22(1), 63–70, 2013.
- 25 Seinfeld, J. H. and Pandis, S. N.: Atmospheric chemistry and physics: from air pollution to climate change, John Wiley & Sons. [online] Available from: [https://books.google.com/books?hl=fr&lr=&id=n\\_RmCgAAQBAJ&oi=fnd&pg=PR23&dq=From+air+pollution+to+climate+change&ots=gRF8EOocbl&sig=4lGHk8PQHENUjWhfU3Vn-AQ4DFc](https://books.google.com/books?hl=fr&lr=&id=n_RmCgAAQBAJ&oi=fnd&pg=PR23&dq=From+air+pollution+to+climate+change&ots=gRF8EOocbl&sig=4lGHk8PQHENUjWhfU3Vn-AQ4DFc) (Accessed 9 August 2017), 2016.
- Sutton, M. A., Dragosits, U., Tang, Y. S. and Fowler, D.: Ammonia emissions from non-agricultural sources in the UK, *Atmos. Environ.*, 34(6), 855–869, doi:10.1016/S1352-2310(99)00362-3, 2000.
- 30 Tam, P. S., Kittrell, J. R. and Eldridge, J. W.: Desulfurization of fuel oil by oxidation and extraction. 1. Enhancement of extraction oil yield, *Ind. Eng. Chem. Res.*, 29(3), 321–324, doi:10.1021/ie00099a002, 1990.
- UNDP: United Nations development Programme: Etude NAMA (Nationally Appropriate Mitigation Action) sur le charbon de bois durable en Côte d’Ivoire, [online] Available from: <http://www.unclearn.org/sites/default/files/inventory/undp02022015.pdf> (Accessed 9 August 2017), 2015.
- 35 UNECA: United Nations Economic commission for Africa: Profil économique pour l’Afrique de l’Ouest en 2015 et Perspectives en 2016, [online] Available from: [http://www.uneca.org/sites/default/files/uploaded-documents/SROs/WA/ice19/cie-19eme-profil-econ\\_s\\_reg\\_french\\_final03fev2016.pdf](http://www.uneca.org/sites/default/files/uploaded-documents/SROs/WA/ice19/cie-19eme-profil-econ_s_reg_french_final03fev2016.pdf), 2016.
- 40 Val, S., Liousse, C., Doubia, E. H. T., Galy-Lacaux, C., Cachier, H., Marchand, N., Badel, A., Gardrat, E., Sylvestre, A. and Baeza-Squiban, A.: Physico-chemical characterization of African urban aerosols (Bamako in Mali and Dakar in Senegal) and their toxic effects in human bronchial epithelial cells: description of a worrying situation, *Part. Fibre Toxicol.*, 10, UNSP 10, doi:10.1186/1743-8977-10-10, 2013.
- Whitehead, J. D., Longley, I. D. and Gallagher, M. W.: Seasonal and diurnal variation in atmospheric ammonia in an urban environment measured using a quantum cascade laser absorption spectrometer, *Water. Air. Soil Pollut.*, 183(1–4), 317–329, doi:10.1007/s11270-007-9381-5, 2007.
- 45



WHO, Ed.: Air quality guidelines: global update 2005 : particulate matter, ozone, nitrogen dioxide and sulfur dioxide, World Health Organization, Regional Office for Europe, Copenhagen, Denmark., 2006.

WHO: Ambient air pollution: A global assessment of exposure and burden of disease, [online] Available from: <http://apps.who.int/iris/bitstream/10665/250141/1/9789241511353-eng.pdf?ua=1>, 2016.

- 5 World Bank: Côte d'Ivoire Home, World Bank Côte Ivoire [online] Available from: <http://www.worldbank.org/en/country/Cotedivoire> (Accessed 1 December 2016), 2016.

Xia, X., Qi, Q., Liang, H., Zhang, A., Jiang, L., Ye, Y., Liu, C. and Huang, Y.: Pattern of Spatial Distribution and Temporal Variation of Atmospheric Pollutants during 2013 in Shenzhen, China, *Isprs Int. J. Geo-Inf.*, 6(1), 2, doi:10.3390/ijgi6010002, 2017.

- 10 Yao-Kouassi, Q. C.: A la recherche d'une synergie pour la gestion des déchets ménagers en Côte d'Ivoire: cas du district d'Abidjan, Le Mans. [online] Available from: <http://www.theses.fr/2010LEMA3006> (Accessed 9 August 2017), 2010.

Yapi-Diahou, A., KOFFI-DIDIA, A., KOFFI, B. and others: Les périphéries abidjanaises: territoires de redistribution et de relégation, *Métrop. Sud Vues Leurs Périphéries Graf.*, (34), 107–122, 2011.

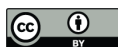

#### List of Tables

|                                                                                                                                                                                                         |    |
|---------------------------------------------------------------------------------------------------------------------------------------------------------------------------------------------------------|----|
| Table 1: Geographical coordinates of sampling sites and majors source of air pollution nearby.....                                                                                                      | 23 |
| Table 2: Gaseous pollutants concentrations and standard deviation on 21 sampling sites in Abidjan during the dry season<br>5 (December 15 <sup>th</sup> , 2015 - February 16 <sup>th</sup> , 2016)..... | 24 |
| Table 3: gaseous pollutants concentrations (ppb) in different sites of Abidjan and in other cities of developing countries ....                                                                         | 25 |

**Table 1: Geographical coordinates of sampling sites and majors source of air pollution nearby.**

| ID code <sup>o</sup> | Site Name                  | Municipality | Latitude   | Longitude  | Land Use                       |
|----------------------|----------------------------|--------------|------------|------------|--------------------------------|
| A1                   | 220 Lgts Liberté           | Adjame       | 5°21'14" N | 4°01'04" W | Traffic                        |
| A2                   | Gesco                      | Yopougon     | 5°21'31" N | 4°06'03" W | Traffic                        |
| A3                   | N'Dotré                    | Abobo        | 5°26'41" N | 4°04'10" W | Traffic                        |
| A4                   | Corridor Anyama            | Anyama       | 5°31'8" N  | 4°03'34" W | Suburban                       |
| A5                   | Pharmacy Cadre Blvd        | Plateau      | 5°19'33" N | 4°01'26" W | Traffic/ Administrative center |
| A6                   | Airport-FHB                | Port-Bouet   | 5°16'26" N | 3°55'21" W | Traffic                        |
| A7                   | Town hall Attecoube        | Attecoube    | 5°19'52" N | 4°02'23" W | Popular district / Traffic     |
| A8                   | Town hall Abobo            | Abobo        | 5°25'15" N | 4°01'00" W | Traffic                        |
| A9                   | Yopougon industrial area   | Yopougon     | 5°22'12" N | 4°04'52" W | Industrial                     |
| A10                  | Zone 3                     | Marcory      | 5°17'48" N | 3°59'57" W | Industrial                     |
| A11                  | Tri postal-vridi           | Port-Bouet   | 5°16'12" N | 4°00'07" W | Industrial / harbor            |
| A12                  | University FHB             | Cocody       | 5°20'42" N | 3°59'27" W | Residential district           |
| A13                  | Angré                      | Cocody       | 5°23'27" N | 3°59'34" W | Residential district           |
| A14                  | Place Inch'allah           | Koumassi     | 5°17'52" N | 3°57'20" W | Domestic fires/Residential     |
| A15                  | Akouédo                    | Cocody       | 5°21'12" N | 3°56'16" W | Waste burning                  |
| A16                  | Niangon Bracodi            | Yopougon     | 5°19'44" N | 4°06'21" W | Domestic fires                 |
| A17                  | Scientific pole CNRI-UFHB  | Bingerville  | 5°21'30" N | 3°54'07" W | Suburban background            |
| A18                  | Songon health center       | Songon       | 5°19'6" N  | 4°12'06" W | Suburban background            |
| A19                  | Niangon Adjamé             | Yopougon     | 5°20'15" N | 4°07'08" W | Suburban background            |
| A20                  | Gonzagueville              | Port-Bouet   | 5°14'31" N | 3°53'09" W | Suburban                       |
| A21                  | Ecological research center | Treichville  | 5°18'41" N | 4°00'10" W | Green area                     |


**Table 2: Gaseous pollutants concentrations and standard deviation on 21 sampling sites in Abidjan during the dry season (December 15<sup>th</sup>, 2015 - February 16<sup>th</sup>, 2016).**

| Sampling sites |                            |          | Concentration in ppb |                 |                  |                 |                |
|----------------|----------------------------|----------|----------------------|-----------------|------------------|-----------------|----------------|
| ID Code        | Name                       | Land use | NO <sub>2</sub>      | NH <sub>3</sub> | HNO <sub>3</sub> | SO <sub>2</sub> | O <sub>3</sub> |
| A1             | 220 Lgts Liberté           | Tr       | 20.8±5.0             | 31.1±6.1        | 1.1±0.1          | 2.6±1.4         | 11.3±1.0       |
| A2             | Gesco                      | Tr       | 11.6±1.0             | 27.6±2.3        | 0.6±0.1          | 6.8±1.3         | 12.4±1.0       |
| A3             | N'Dotré                    | Tr       | 12.2±1.8             | 23.5±2.4        | 0.4±0.1          | 7.2±1.2         | 8.9±0.9        |
| A4             | Corridor Anyama            | Tr/Df    | 7.7±0.6              | 32.2±3.8        | 0.2±0.0          | 4.7±0.8         | 5.1±0.6        |
| A5             | Pharmacy Cadre Blvd        | Tr       | 23.9±4.9             | 23.0±2.2        | 1.1±0.4          | 3.1±1.1         | 7.8±0.4        |
| A6             | Airport-FHB                | Tr       | 6.9±0.9              | 18.8±1.9        | 0.9±0.1          | 0.4±0.2         | 18.8±3.0       |
| A7             | Town hall Attécoubé        | Pop/Tr   | 17.5±2.9             | 37.0±10.9       | 1.2±0.5          | 1.5±0.5         | 12.4±2.0       |
| A8             | Town hall Abobo            | Pop/Tr   | 20.4±2.1             | 30.6±3.6        | 1.1±0.3          | 1.4±0.6         | 10.5±1.9       |
| A9             | Yopougon industrial area   | Ind      | 19.9±3.4             | 21.6±2.8        | 1.3±0.2          | 1.8±0.7         | 12.2±1.3       |
| A10            | Zone 3                     | Ind/Tr   | 17.7±1.0             | 20.9±2.9        | 0.8±0.1          | 1.6±0.4         | 8.8±1.5        |
| A11            | Tri postal-vridi           | Ind/Har  | 25.0±1.7             | 19.6±1.6        | 0.7±0.2          | 1.9±0.5         | 9.6±1.9        |
| A12            | University FHB             | Res      | 12.5±2.4             | 23.9±5.0        | 1.0±0.4          | 0.7±0.1         | 14.1±0.4       |
| A13            | Angré                      | Res      | 18.5±2.2             | 26.9±2.4        | 1.2±0.3          | 1.7±0.1         | 12.9±1.9       |
| A14            | Place Inch'allah           | Df/Tr    | 17.6±1.9             | 67.7±8.3        | 0.6±0.1          | 1.1±0.3         | 7.6±2.4        |
| A15            | Akouédo                    | Wb       | 12.0±1.4             | 39.1±2.1        | 1.3±0.2          | 1.2±0.7         | 17.6±1.9       |
| A16            | Niangon Bracodi            | Df       | 18.3±0.6             | 102,1±9.1       | 1.2±0.2          | 1.1±0.2         | 10.2±1.4       |
| A17            | Scientific pole cnri-UFHB  | Sub      | 13.6±3.7             | 22.5±6.1        | 1.4±0.3          | 1.0±0.3         | 16.8±3.0       |
| A18            | Songon Heath center        | Sub      | 2.7±0.1              | 9.1±1.7         | 0.7±0.2          | 1.9±0.2         | 12.1±1.3       |
| A19            | Niangon Adjamé             | Sub      | 5.4±0.3              | 44.0±2.2        | 0.2±0.0          | 3.4±1.0         | 6.8±0.7        |
| A20            | Gonzagueville              | Sub/Df   | 6.9±0.5              | 14.3±2.6        | 0.8±0.4          | 0.4±0.1         | 19.1±1.7       |
| A21            | Ecological research center | Gre      | 6.0±0.7              | 13.6±2.9        | 0.6±0.2          | 0.4±0.1         | 13.6±1.4       |





**Table 3: gaseous pollutants concentrations (ppb) in different sites of Abidjan and in other cities of developing countries**

| Sites                  | Type                     | Period                | NO <sub>2</sub> (ppb) | NH <sub>3</sub> (ppb) | HNO <sub>3</sub> (ppb) | SO <sub>2</sub> (ppb) | O <sub>3</sub> (ppb) | References             |
|------------------------|--------------------------|-----------------------|-----------------------|-----------------------|------------------------|-----------------------|----------------------|------------------------|
| Abidjan, Cote d'Ivoire | Traffic                  | Dec. 2015-Feb. 2016   | 17.8                  | 27.2                  | 0.9                    | 4.2                   | 10.2                 | This study             |
|                        | Industrial               | Dec. 2015-Feb. 2016   | 20.9                  | 20.7                  | 0.9                    | 1.7                   | 10.2                 | This study             |
|                        | Residential              | Dec. 2015-Feb. 2016   | 16.1                  | 21.9                  | 0.8                    | 1.0                   | 9.9                  | This study             |
|                        | Suburban                 | Dec. 2015-Feb. 2016   | 7.0                   | 22.6                  | 0.6                    | 2.0                   | 12.2                 | This study             |
|                        | Domestic fires           | Dec. 2015-Feb. 2016   | 17.9                  | 84.9                  | 0.9                    | 1.1                   | 8.9                  | This study             |
| Dakar, Senegal         | Waste burning            | Dec. 2015-Feb. 2016   | 12.0                  | 39.1                  | 1.3                    | 1.2                   | 17.6                 | This study             |
|                        | Traffic                  | Jan. 2008-Dec.2009    | 31.7                  | 21.1                  | 1.3                    | 15.9                  | 7.7                  | (Adon et al., 2016)    |
| Bamako, Mali           | Traffic                  | Jun. 2008 - Dec. 2009 | 16.2                  | 46.7                  | 0.6                    | 3.6                   | 5.1                  | (Adon et al., 2016)    |
| Cairo, Egypt           | Suburban                 | Winter of 2009-2010   | 35.5                  | 50.9                  | -                      | 13.0                  | -                    | (Hassan et al., 2013)  |
| Amersfoort, SA *       | Suburban, Industrialized | Aug. 2007-Jul. 2008   | 2.9                   | -                     | -                      | 5.5                   | 23.3                 | (Lourens et al., 2011) |
| Amersfoort, SA *       | Suburban, Industrialized | 1995-2005             | 2.5                   | 1.2                   | 0.9                    | 2.8                   | 27                   | (Martins et al., 2007) |
| Singapore              | Urban                    | Sept. 2007- Aug. 2008 | 23.8-28.1             | -                     | -                      | 12.5-14.9             | -                    | (He et al., 2014)      |
| Al Ain City, UAE       | Traffic                  | Feb.2005-Feb.2006     | 31.5                  | 17.1                  | -                      | 5.8                   | 8.7                  | (Salem et al., 2009)   |
| Shenzhen, China        | Urban                    | March. 2013-Feb.2014  | 20.7                  | -                     | -                      | 4.9                   | 35.6                 | (Xia et al., 2016)     |
| St. John's, India      | Urban                    |                       | 4.8                   | 9.5                   | 0.86                   | 1.56                  | -                    | (Kumar et al., 2004)   |

\*SA: South Africa



### List of Figures

|    |                                                                                                                                                                                                                                                                                                                                                                                                                   |    |
|----|-------------------------------------------------------------------------------------------------------------------------------------------------------------------------------------------------------------------------------------------------------------------------------------------------------------------------------------------------------------------------------------------------------------------|----|
|    | Figure 1: Spatial distribution of the 21 sampling sites (A <sub>1</sub> -A <sub>21</sub> ) and major source of air pollution nearby in the District of Abidjan. ....                                                                                                                                                                                                                                              | 27 |
| 5  | Figure 2: INDAAF passive samplers mounted in duplicate on a stainless steel holder.....                                                                                                                                                                                                                                                                                                                           | 28 |
|    | Figure 3: Temperature and relative humidity measured by (ASECNA) in Abidjan during the dry season (December 15 <sup>th</sup> , 2015 –February 16 <sup>th</sup> , 2016). ....                                                                                                                                                                                                                                      | 29 |
|    | Figure 4: Hourly wind rose diagram of Abidjan during the dry season (December 15 <sup>th</sup> , 2015 – February 16 <sup>th</sup> , 2016).....                                                                                                                                                                                                                                                                    | 30 |
|    | Figure 5: Regression between interpolated data and observed data using kriging method. Fig 5.a for NO <sub>2</sub> , SO <sub>2</sub> , HNO <sub>3</sub> , O <sub>3</sub> . Fig 5.b for NH <sub>3</sub> determined by removing 2 extremes values).....                                                                                                                                                             | 31 |
| 10 | Figure 6: Spatial distribution of NO <sub>2</sub> in the district of Abidjan during the dry season (December 15 <sup>th</sup> , 2015 – February 16 <sup>th</sup> , 2016).....                                                                                                                                                                                                                                     | 32 |
|    | Figure 7: Spatial distribution of SO <sub>2</sub> in the district of Abidjan during the dry season (December 15 <sup>th</sup> , 2015 – February 16 <sup>th</sup> , 2016).....                                                                                                                                                                                                                                     | 33 |
| 15 | Figure 8: Spatial distribution of NH <sub>3</sub> in the district of Abidjan during the dry season (December 15 <sup>th</sup> , 2015 – February 16 <sup>th</sup> , 2016).....                                                                                                                                                                                                                                     | 34 |
|    | Figure 9: Spatial distribution of HNO <sub>3</sub> in the district of Abidjan during the dry season (December 15 <sup>th</sup> , 2015 – February 16 <sup>th</sup> , 2016).....                                                                                                                                                                                                                                    | 35 |
|    | Figure 10: Spatial distribution of O <sub>3</sub> in the district of Abidjan during the dry season (December 15 <sup>th</sup> , 2015 – February 16 <sup>th</sup> , 2016).....                                                                                                                                                                                                                                     | 36 |
| 20 | Figure 11: Concentration of gaseous pollutants by anthropogenic sectors of activity in the district of Abidjan.....                                                                                                                                                                                                                                                                                               | 37 |
|    | Figure 12: African countries coloured by UN sub-region for which NO <sub>2</sub> and SO <sub>2</sub> studies were identified and included in this publication. ....                                                                                                                                                                                                                                               | 38 |
|    | Figure 13: NO <sub>2</sub> concentration levels in µg.m <sup>-3</sup> in African capitals at different time scale (hourly, daily, weekly, monthly, and annually) as reported in literature. Green bars represent lower and upper range of means if reported. Black points represent average concentration of NO <sub>2</sub> . Red vertical lines illustrate current WHO guidelines at different time scale.....  | 39 |
| 25 | Figure 14: SO <sub>2</sub> concentration levels in µg.m <sup>-3</sup> in African capitals at different time scale (hourly, daily, weekly, monthly, and annually) as reported in literature. Green bars represent lower and upper range of means if reported. Black points represent average concentration of SO <sub>2</sub> . Red vertical lines illustrate current WHO guidelines at different time scale. .... | 40 |

30

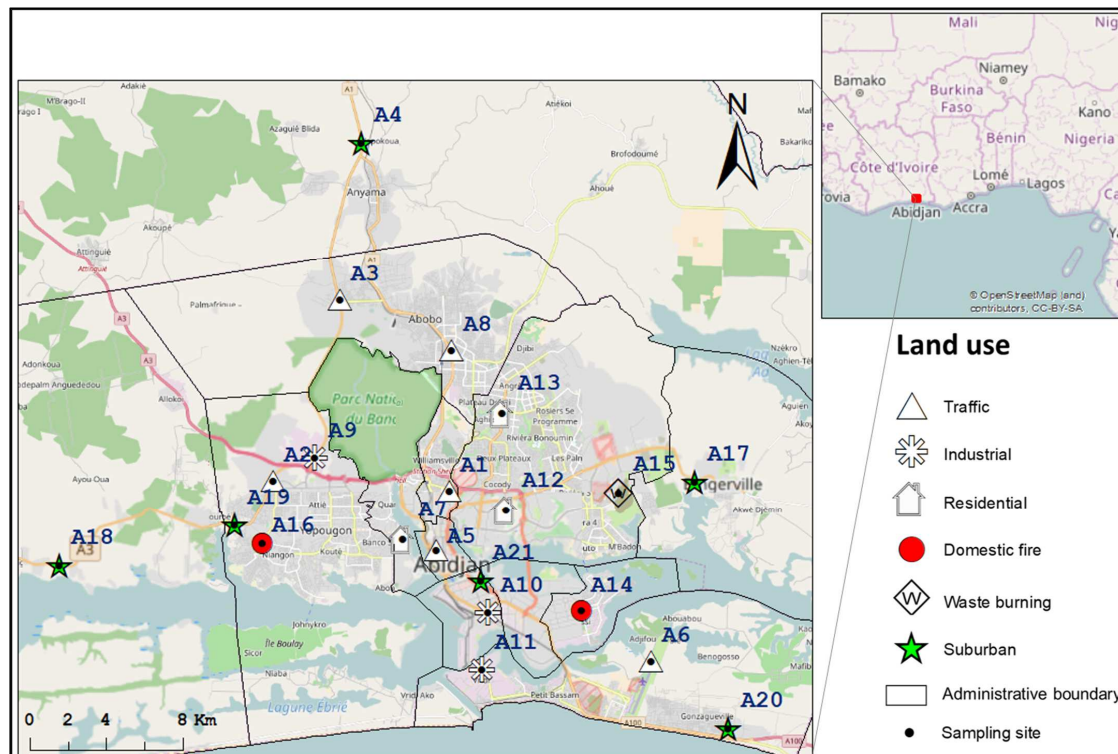

Figure 1: Spatial distribution of the 21 sampling sites (A1-A21) and major source of air pollution nearby in the District of Abidjan.

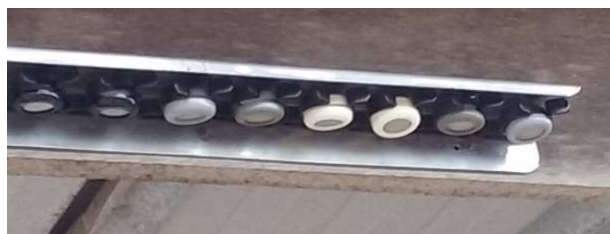

**Figure 2: INDAAF passive samplers mounted in duplicate on a stainless steel holder.**

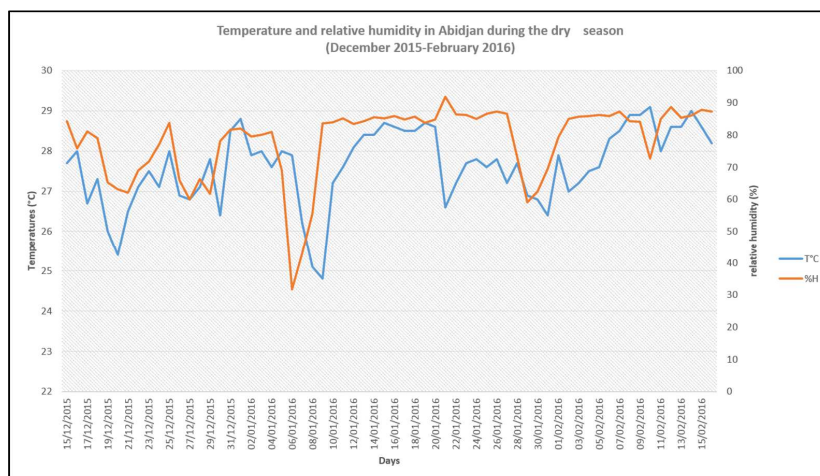

Figure 3: Temperature and relative humidity measured by (ASECNA) in Abidjan during the dry season (December 15<sup>th</sup>, 2015 – February 16<sup>th</sup>, 2016).

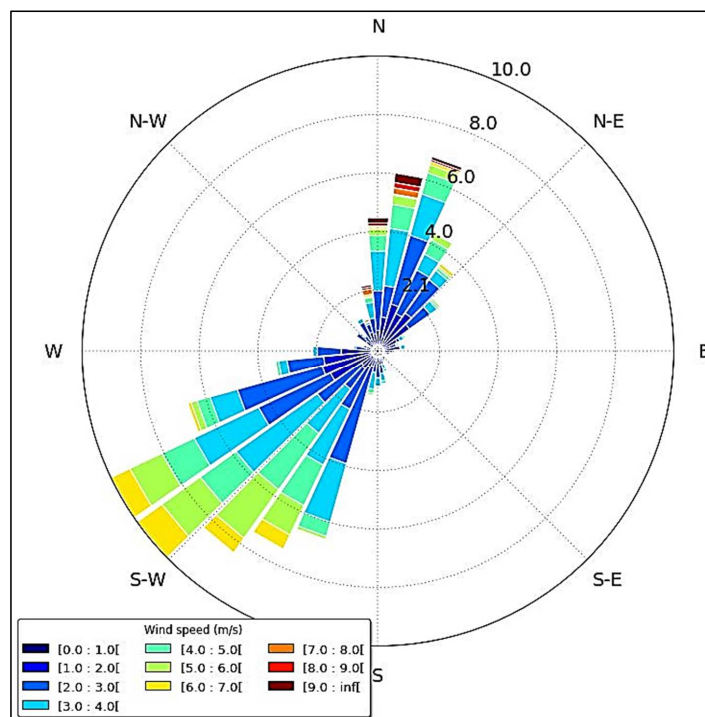

Figure 4: Hourly wind rose diagram of Abidjan during the dry season (December 15<sup>th</sup>, 2015 – February 16<sup>th</sup>, 2016)

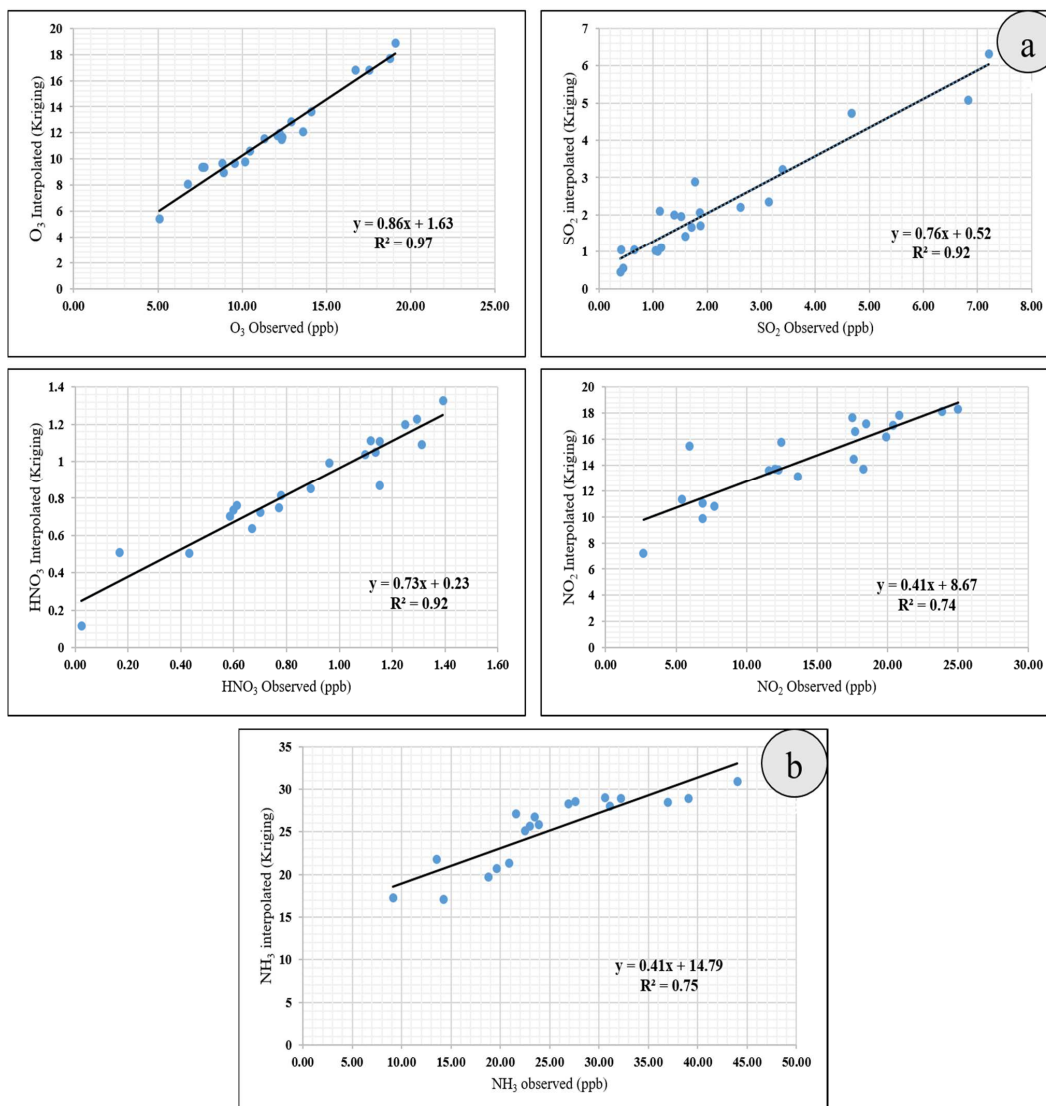

Figure 5: Regression between interpolated data and observed data using kriging method. Fig 5.a for  $NO_2$ ,  $SO_2$ ,  $HNO_3$ ,  $O_3$ . Fig 5.b for  $NH_3$  determined by removing 2 extremes values)

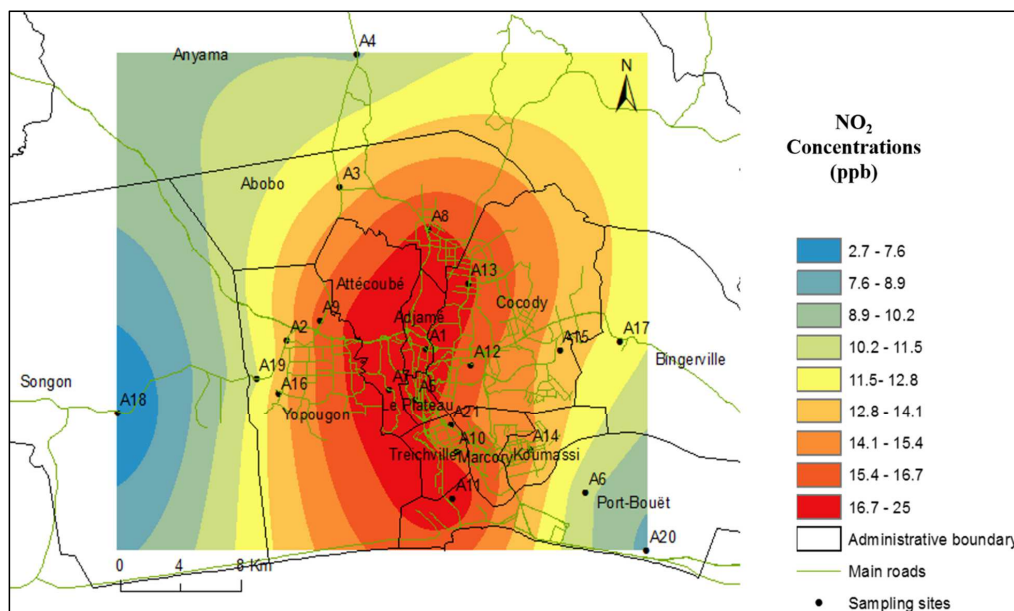

Figure 6: Spatial distribution of NO<sub>2</sub> in the district of Abidjan during the dry season (December 15<sup>th</sup>, 2015 – February 16<sup>th</sup>, 2016).



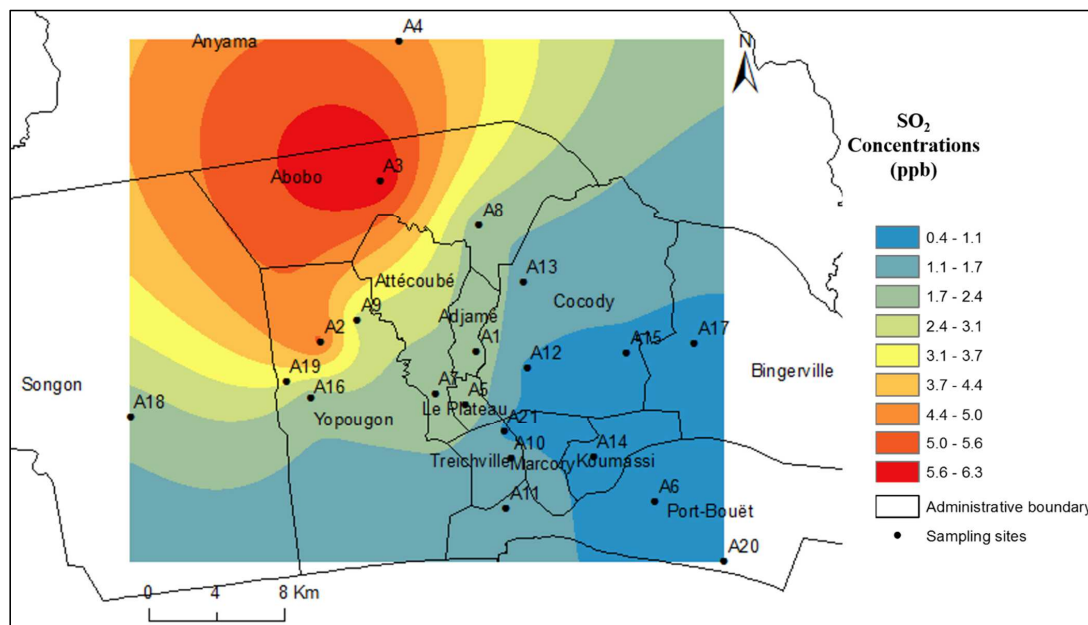

Figure 7: Spatial distribution of SO<sub>2</sub> in the district of Abidjan during the dry season (December 15<sup>th</sup>, 2015 – February 16<sup>th</sup>, 2016).

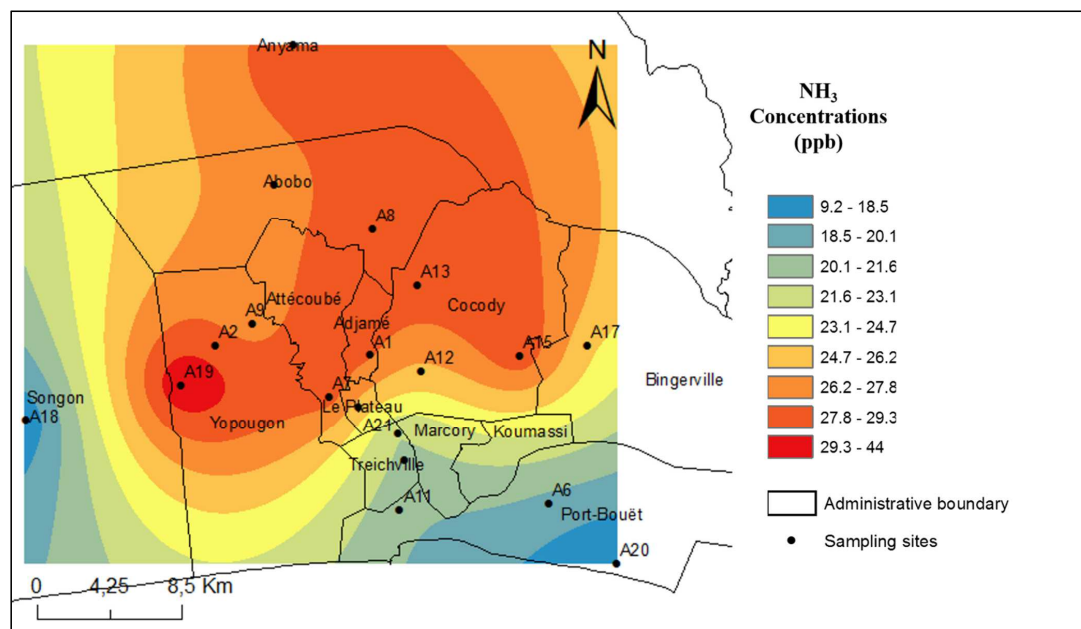

Figure 8: Spatial distribution of NH<sub>3</sub> in the district of Abidjan during the dry season (December 15<sup>th</sup>, 2015 – February 16<sup>th</sup>, 2016).

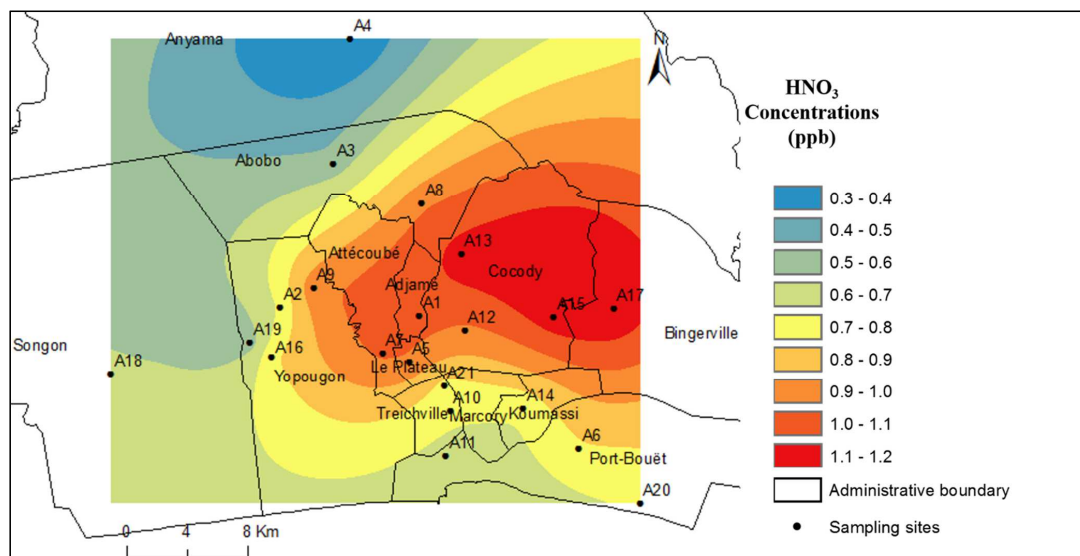

Figure 9: Spatial distribution of HNO<sub>3</sub> in the district of Abidjan during the dry season (December 15<sup>th</sup>, 2015 – February 16<sup>th</sup>, 2016).

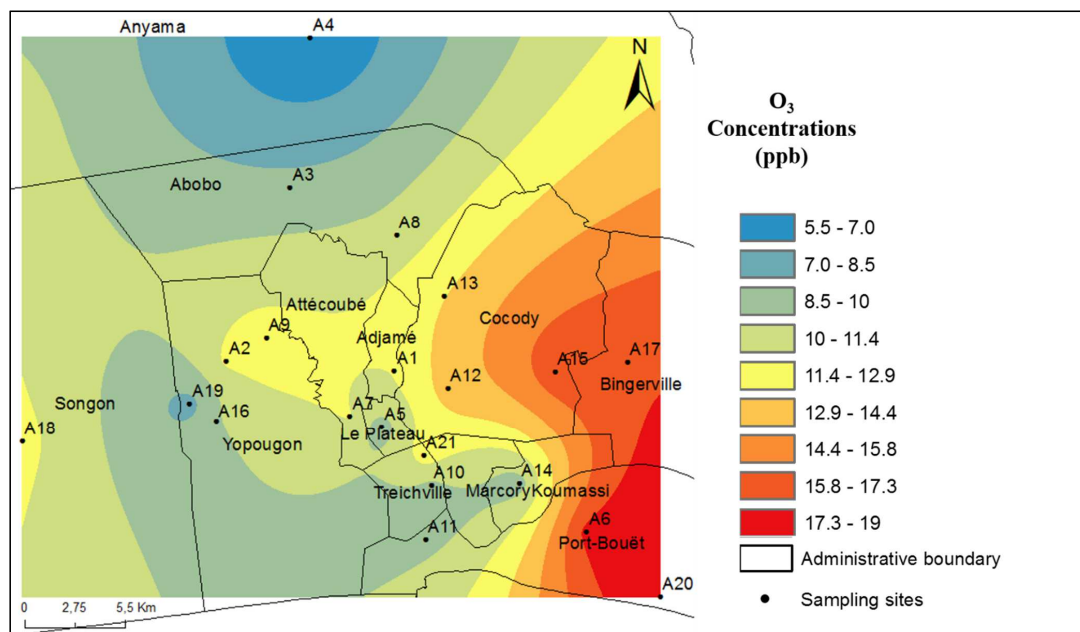

Figure 10: Spatial distribution of O<sub>3</sub> in the district of Abidjan during the dry season (December 15<sup>th</sup>, 2015 – February 16<sup>th</sup>, 2016).

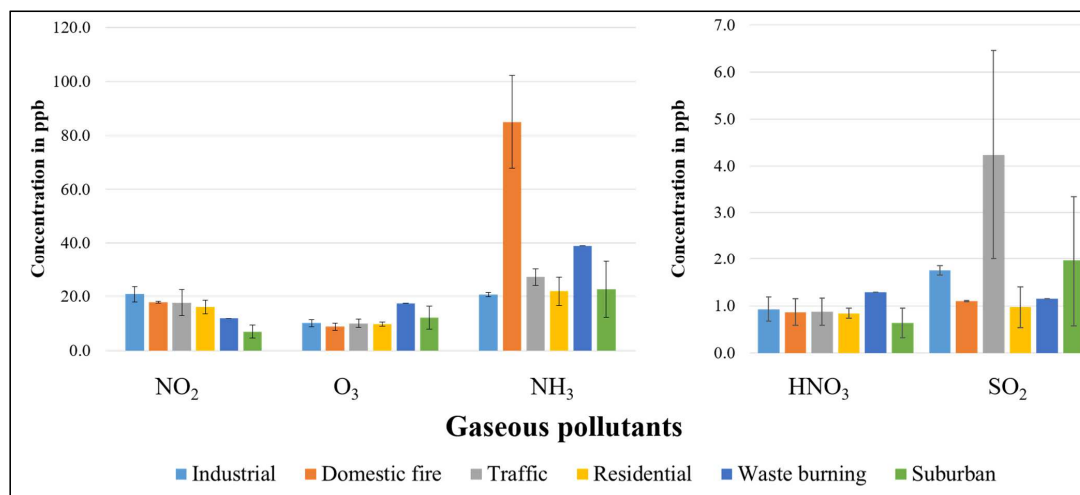

Figure 11: Concentration of gaseous pollutants by anthropogenic sectors of activity in the district of Abidjan.

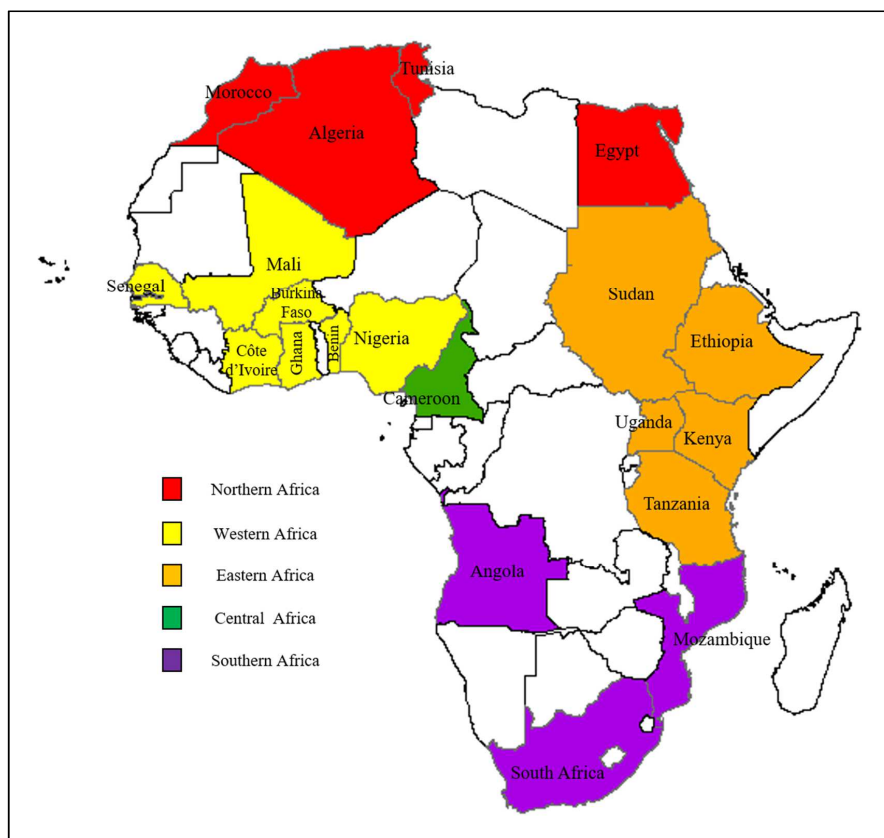

Figure 12: African countries coloured by UN sub-region for which NO<sub>2</sub> and SO<sub>2</sub> studies were identified and included in this publication.

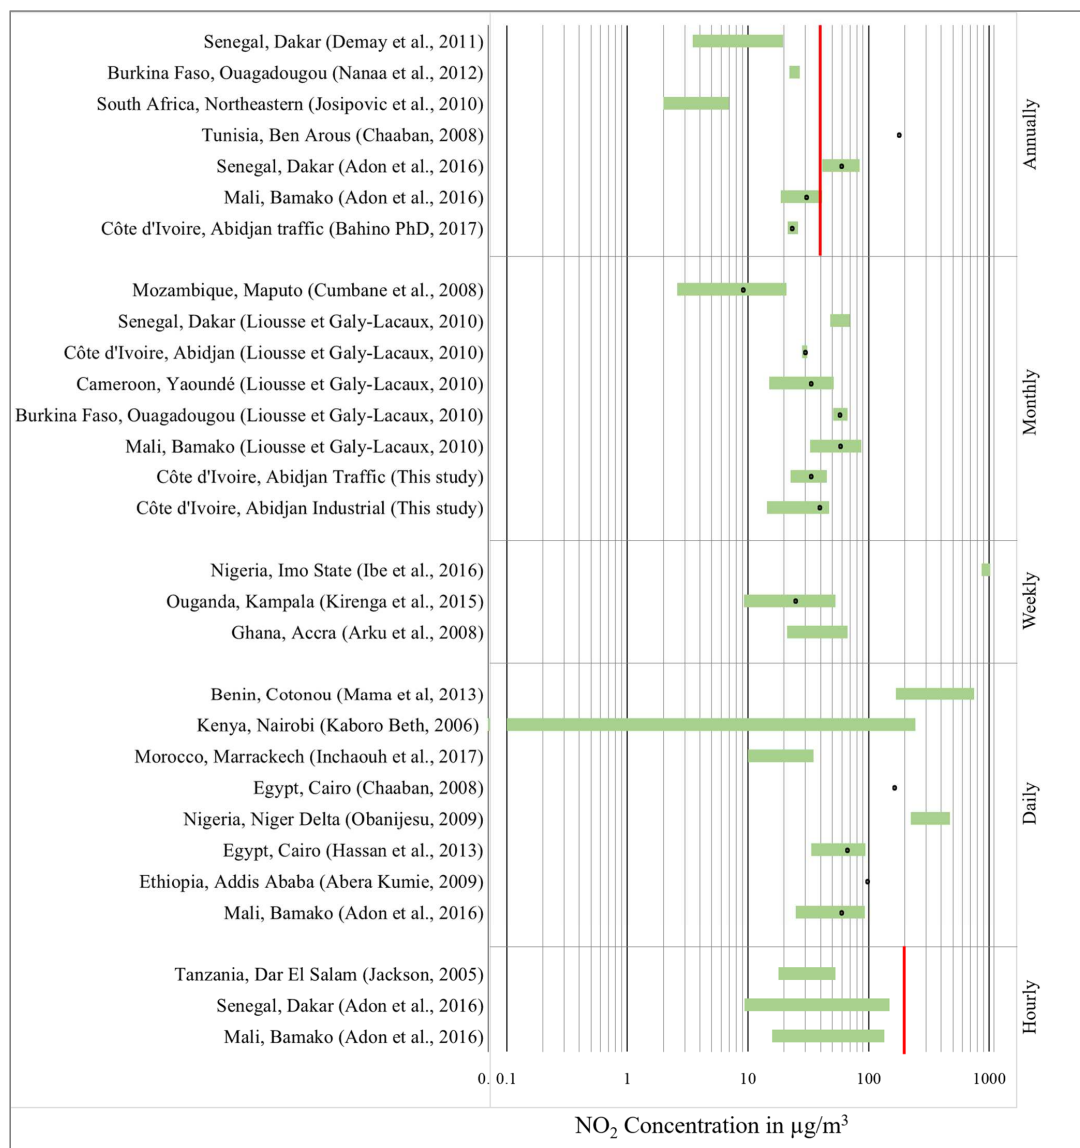

Figure 13: NO<sub>2</sub> concentration levels in µg.m<sup>-3</sup> in African capitals at different time scale (hourly, daily, weekly, monthly, and annually) as reported in literature. Green bars represent lower and upper range of means if reported. Black points represent average concentration of NO<sub>2</sub>. Red vertical lines illustrate current WHO guidelines at different time scale.

5

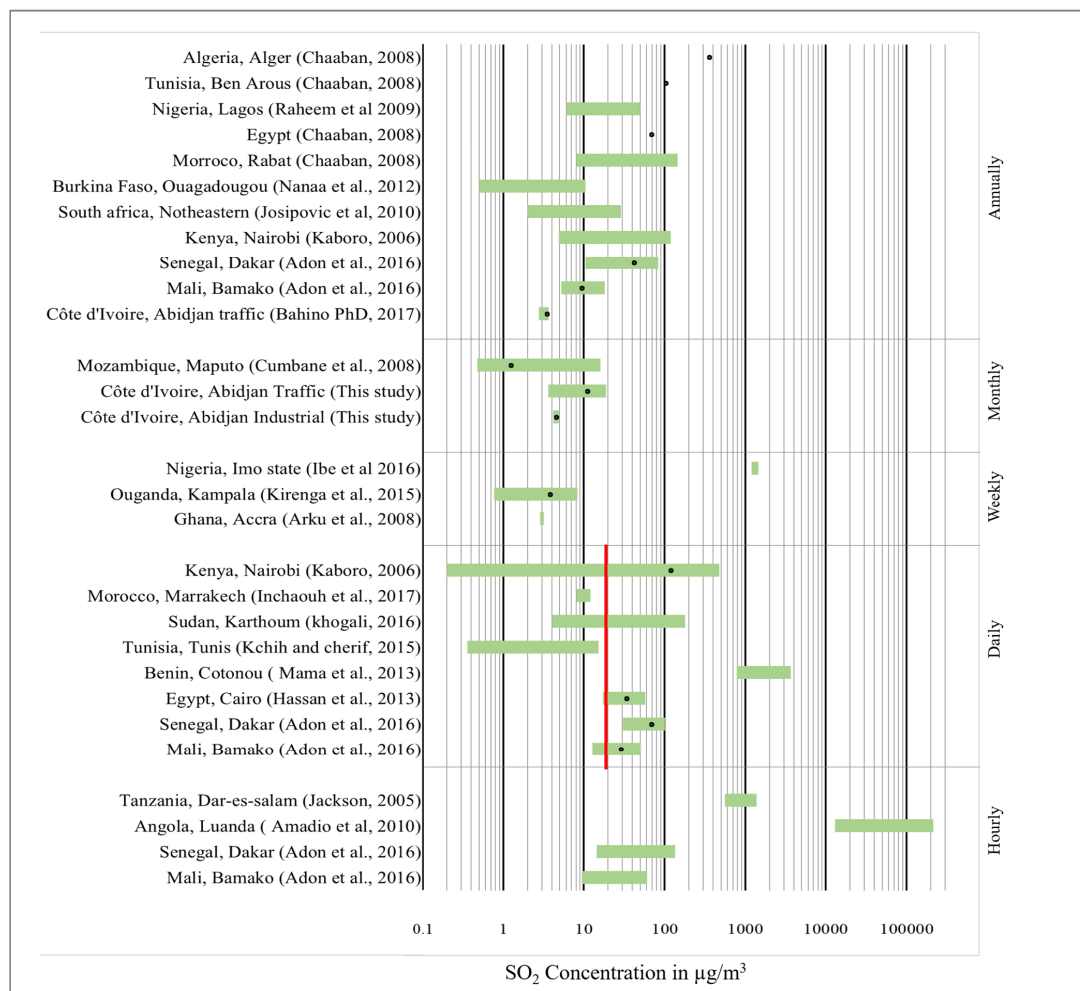

5 Figure 14: SO<sub>2</sub> concentration levels in µg.m<sup>-3</sup> in African capitals at different time scale (hourly, daily, weekly, monthly, and annually) as reported in literature. Green bars represent lower and upper range of means if reported. Black points represent average concentration of SO<sub>2</sub>. Red vertical lines illustrate current WHO guidelines at different time scale.
